# Supplementary material for: Ionic liquid-assisted synthesis of dihydropyrimidin(thi)one Biginelli adducts and investigation of their mechanism of urease inhibition
Source: Royal Society of Chemistry journal article supplement (doi:10.1039/c9nj03556g), 2019-01-01
Supplement: c9nj03556g1.pdf [file c9nj03556g1.pdf]

## SUPPORTING INFORMATION

### **Ionic Liquid-assisted Synthesis of Dihydropyrimidin(thi)ones Biginelli adducts and investigation of their mechanism of urease inhibition**

Taniris C. Braga,<sup>a</sup> Thamara F. Silva,<sup>b</sup> Thamilla M. S. Maciel,<sup>c</sup> Edjan Carlos Dantas da Silva,<sup>d</sup> Edeildo Ferreira da Silva-Júnior,<sup>d</sup> Luzia V. Modolo,<sup>b</sup> Isis M. Figueiredo,<sup>c</sup> Josué C. C. Santos,<sup>c</sup> Thiago Mendonça de Aquino,<sup>d</sup> Ângelo de Fátima<sup>a,\*</sup>

<sup>a</sup>*Grupo de Estudos em Química Orgânica e Biológica (GEQOB), Departamento de Química, Universidade Federal de Minas Gerais, Belo Horizonte, MG, Brazil.*

<sup>b</sup>*Grupo de Estudos em Bioquímica de Plantas (GEBioPlan), Departamento de Botânica, Instituto de Ciências Biológicas, Universidade Federal de Minas Gerais, Belo Horizonte, MG, Brazil*

<sup>c</sup>*Laboratório de Instrumentação e Desenvolvimento em Química Analítica (LINQA), Instituto de Química e Biotecnologia, Universidade Federal de Alagoas, Maceió, AL, Brazil.*

<sup>d</sup>*Núcleo de Análises e Pesquisa em ressonância Magnética Nuclear (NAPRMN), Instituto de Química e Biotecnologia, Universidade Federal de Alagoas, Maceió, AL, Brazil.*

\*Corresponding author:

Ângelo de Fátima: Tel.: +55-31-3409-6373 / E-mail: [adefatima@qui.ufmg.br](mailto:adefatima@qui.ufmg.br)

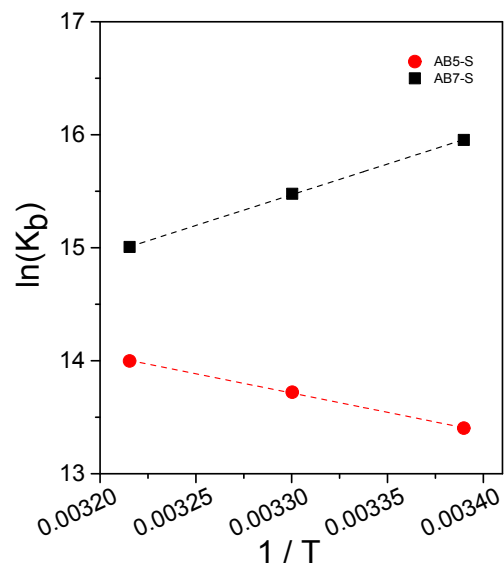

**Figure S1.** Van't Hoff plot for the Biginelli adducts **BA5-S** and **BA7-S** with urease.

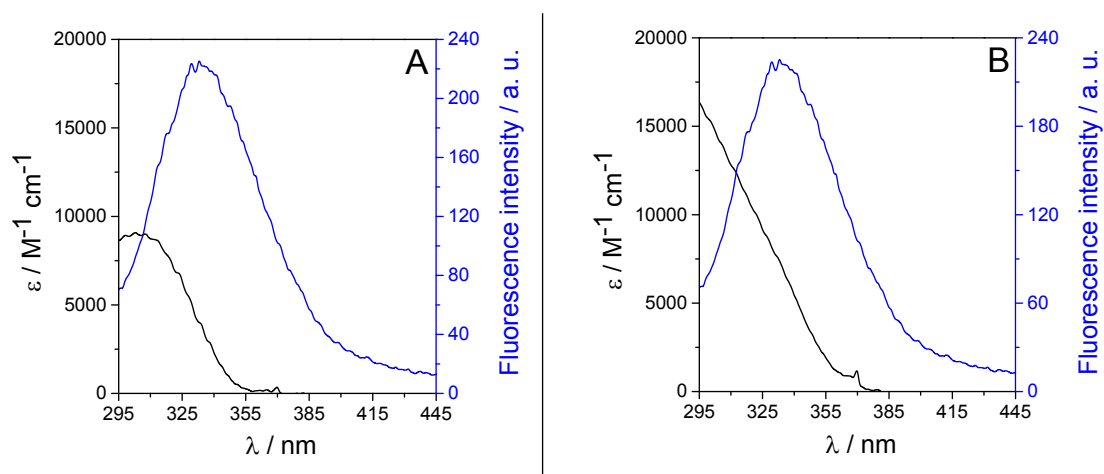

**Figure S2.** Overlap of the fluorescence emission of urease (blue, 5  $\mu\text{M}$ ) with the absorption spectrum of (A) **BA5-S** (black, 5  $\mu\text{M}$ ) and (B) **BA7-S** (black, 5  $\mu\text{M}$ ).

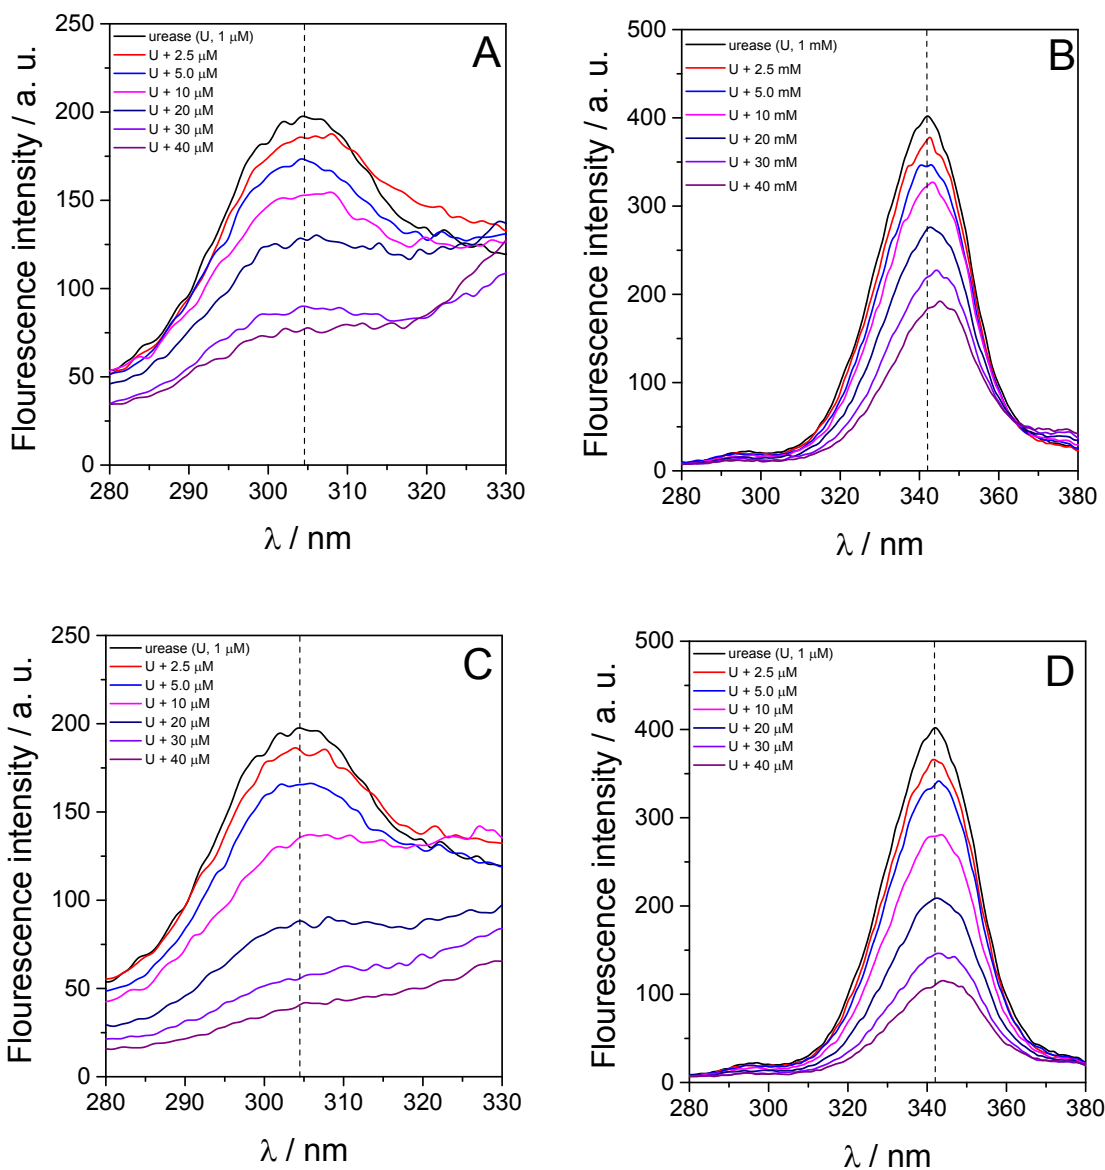

**Figure S3.** Urease (1.0 μM, pH 7.4) synchronous fluorescence spectra upon addition of increasing concentrations of **BA5-S**, monitoring (A)  $\Delta\lambda = 15$  nm (Tyr residues) and (B)  $\Delta\lambda = 60$  nm (Trp residues), and **BA7-S** monitoring (C)  $\Delta\lambda = 15$  nm (Tyr residues) and (D)  $\Delta\lambda = 60$  nm (Trp residues).

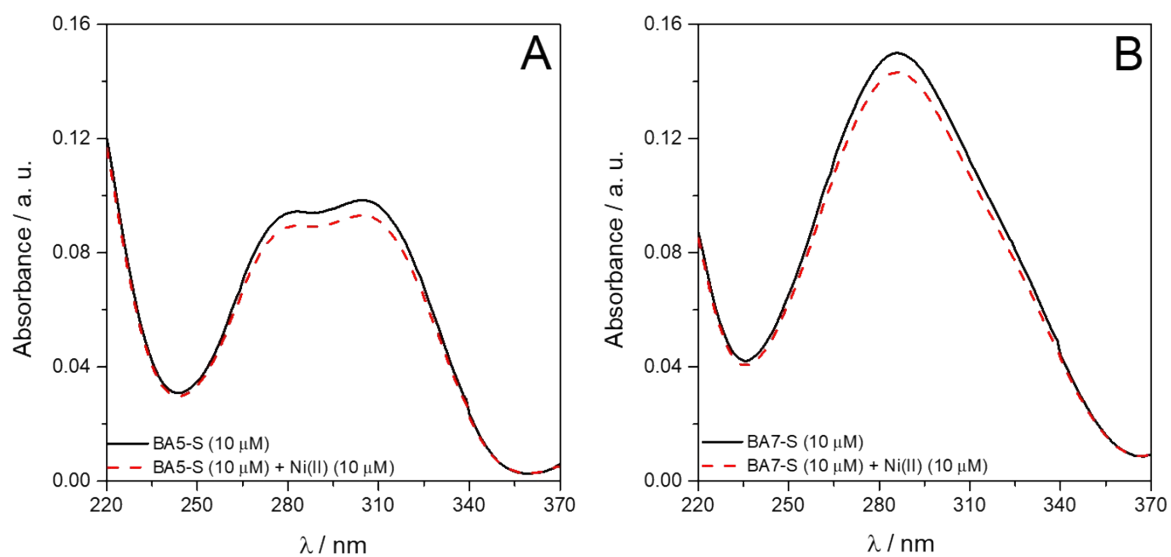

**Figure S4.** UV-vis spectra of the Biginelli adducts (A) **BA5-S** and (B) **BA7-S** in the presence and absence of Ni(II) ions with urease. All compounds and Ni(II) ions in, the same concentration at pH 7. The spectrum for Ni(II) solution was baseline.

**Table S1.** Tridimensional fluorescence parameters for free urease (pH 7.4) or in the presence of the Biginelli adducts **BA5-S** and **BA7-S**. Protein and ligands were used at 1.0 and 40  $\mu$ M, respectively.

| Peak | free urease                                                 |                                             |                         | urease + <b>BA5-S</b>                                       |                                |           | urease + <b>BA7-S</b>                                       |                                |           |
|------|-------------------------------------------------------------|---------------------------------------------|-------------------------|-------------------------------------------------------------|--------------------------------|-----------|-------------------------------------------------------------|--------------------------------|-----------|
|      | Position<br>( $\lambda_{\text{ex}} / \lambda_{\text{em}}$ ) | Stokes <sup>1</sup><br>$\Delta\lambda$ (nm) | F (a. u.)               | Position<br>( $\lambda_{\text{ex}} / \lambda_{\text{em}}$ ) | Stokes<br>$\Delta\lambda$ (nm) | F (a. u.) | Position<br>( $\lambda_{\text{ex}} / \lambda_{\text{em}}$ ) | Stokes<br>$\Delta\lambda$ (nm) | F (a. u.) |
| 1    | $\lambda_{\text{ex}} = \lambda_{\text{em}}$                 | 0                                           | > 1000                  | $\lambda_{\text{ex}} = \lambda_{\text{em}}$                 | 0                              | > 1000    | $\lambda_{\text{ex}} = \lambda_{\text{em}}$                 | 0                              | > 1000    |
| 2    | 285 / 339                                                   | 54                                          | 408 (100%) <sup>2</sup> | 285 / 350                                                   | 65                             | 194 (47%) | 285 / 353                                                   | 68                             | 115 (28%) |
| 3    | 238 / 348                                                   | 110                                         | 53 (100%)               | 238 / 353                                                   | 115                            | 21 (40%)  | 238 / 355                                                   | 117                            | 11 (21%)  |

<sup>1</sup>Stokes shift ( $\Delta\lambda = \lambda_{\text{em}} - \lambda_{\text{ex}}$ )

<sup>2</sup>Numbers in parentheses represent the relative percentage of fluorescence signal. Lower values indicate greater variation in relation to control (urease by itself).

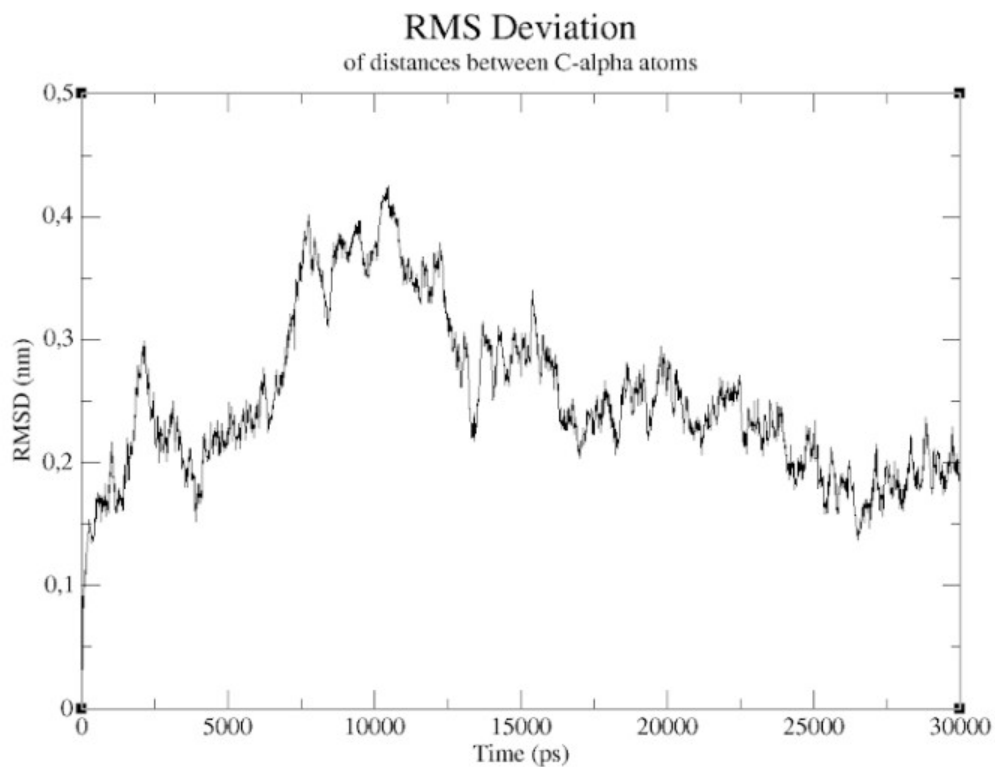

**Figure S5.** RMSD graphic generated for C $_{\alpha}$  atoms of the jack bean urease.

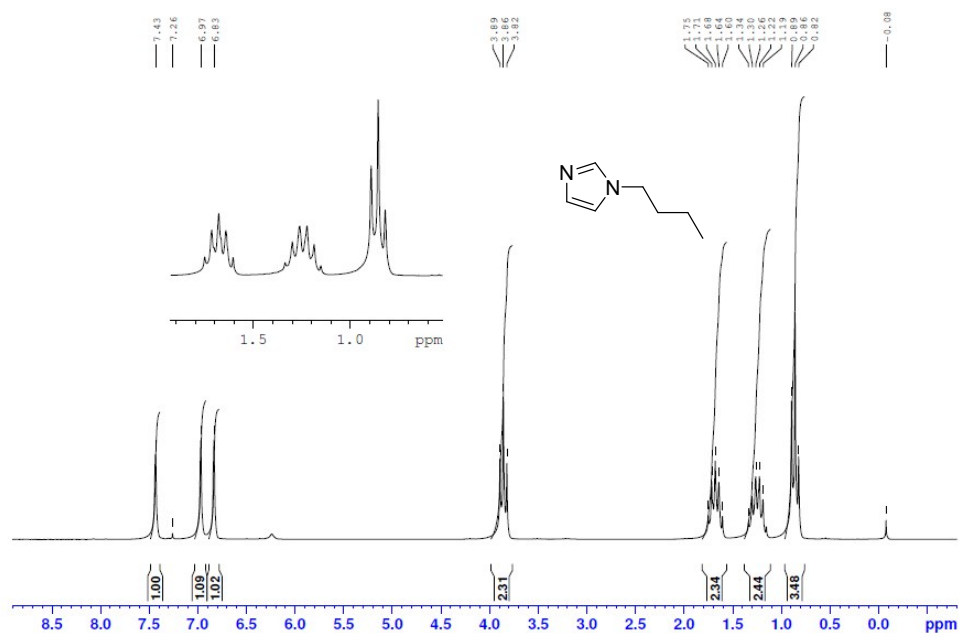

**Figure S6.**  $^1\text{H}$  spectrum of compound 1-butyl-1*H*-imidazole (BIM) (200 MHz,  $\text{CDCl}_3$ ).

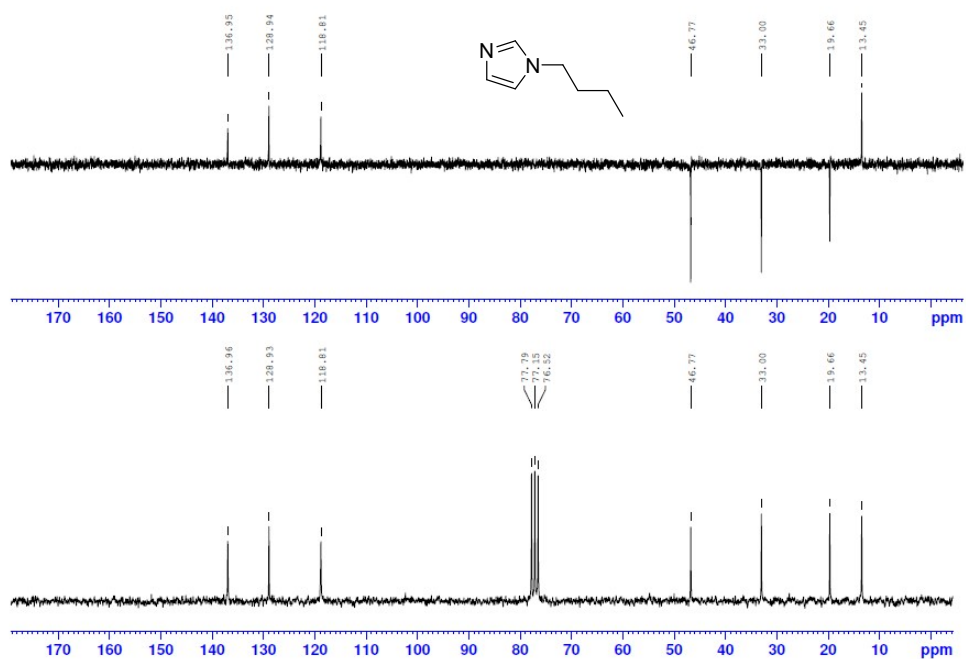

**Figure S7.** <sup>13</sup>C spectrum (bottom) and DEPT 135 subspectrum of compound 1-butyl-1*H*-imidazole (**BIM**) (50 MHz, CDCl<sub>3</sub>).

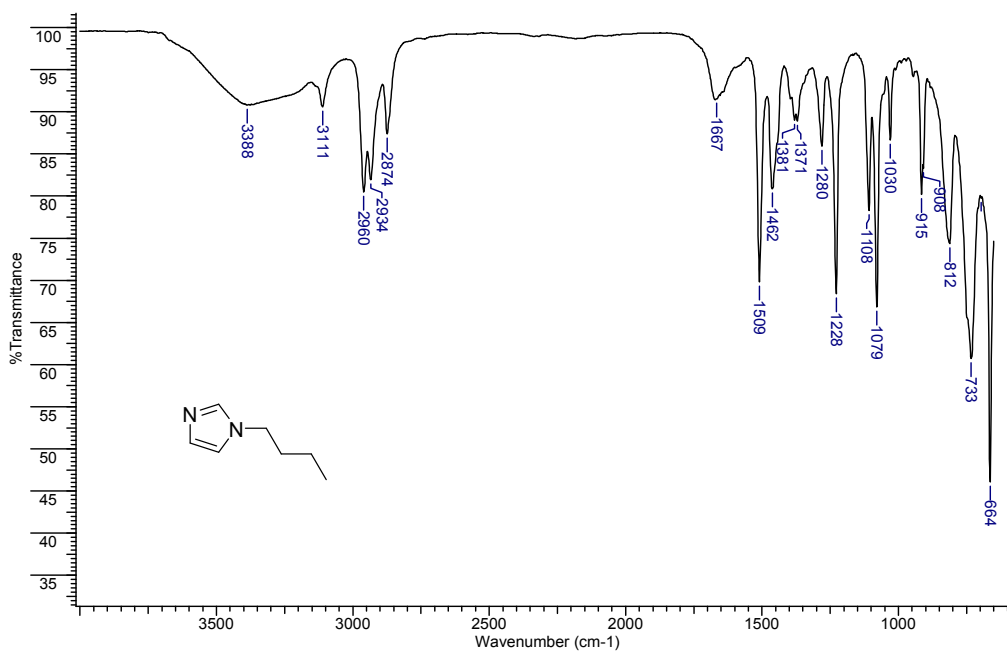

**Figure S8.** Infrared spectrum (ATR) of 1-butyl-1*H*-imidazole (**BIM**).

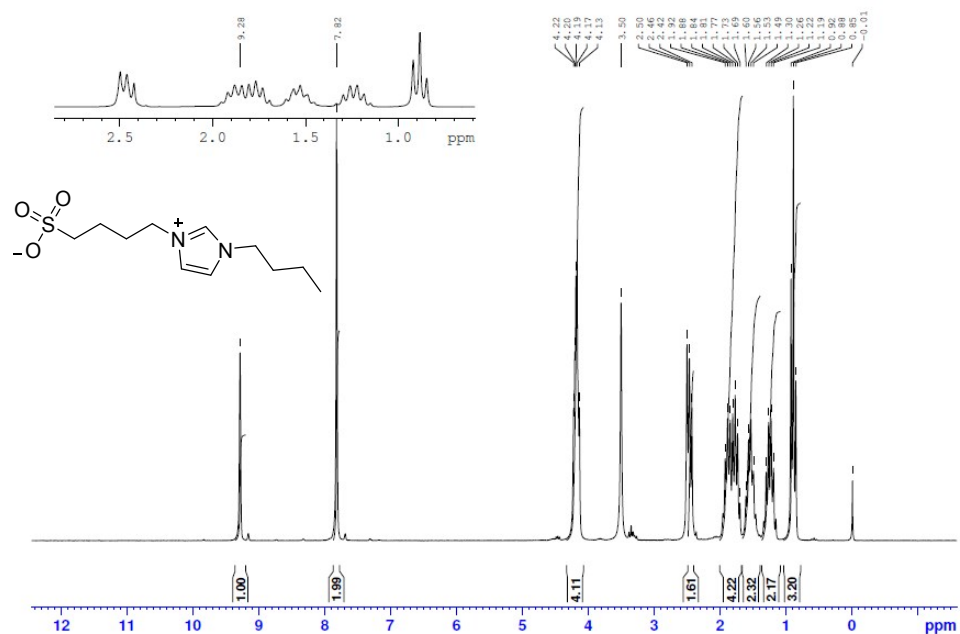

**Figure S9.** <sup>1</sup>H spectrum of compound 4-(1-butyl-1*H*-imidazol-3-ium-3-yl)butane-1-sulfonate (**BIMS**) (200 MHz, DMSO-*d*<sub>6</sub>).

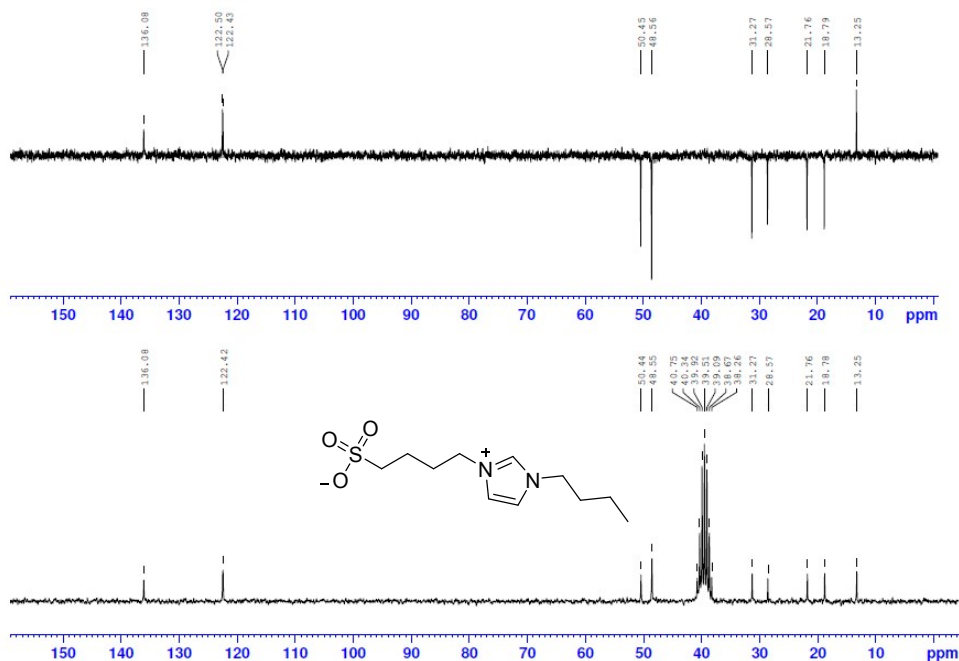

**Figure S10.** <sup>13</sup>C spectrum (bottom) and DEPT 135 subspectrum of compound 4-(1-butyl-1*H*-imidazol-3-ium-3-yl)butane-1-sulfonate (**BIMS**) (50 MHz, DMSO-*d*<sub>6</sub>).



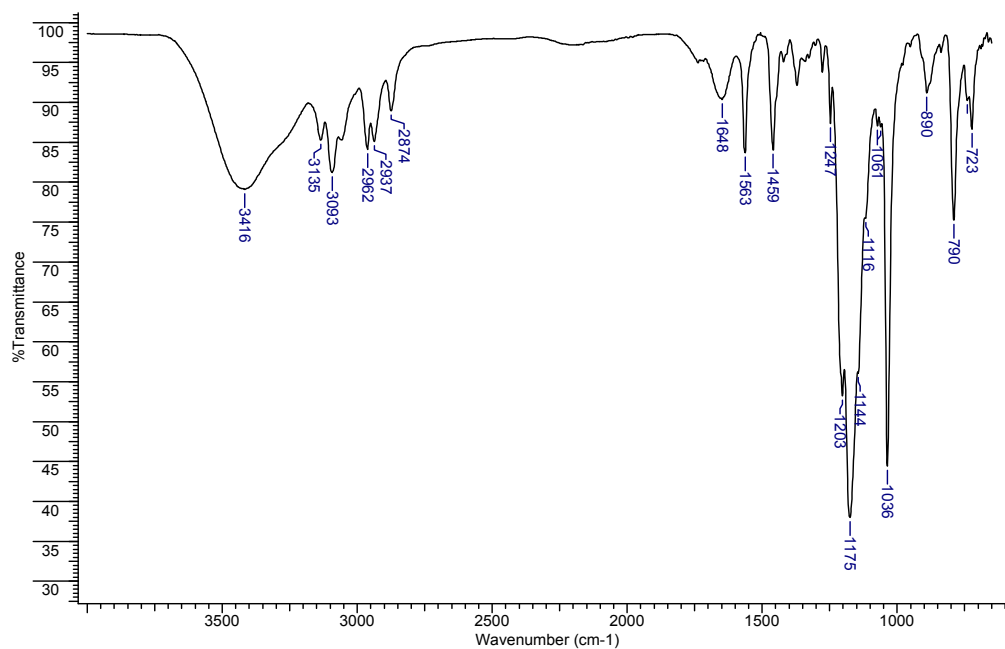

**Figure S11.** Infrared spectrum (ATR) of 4-(1-butyl-1*H*-imidazol-3-ium-3-yl)butane-1-sulfonate (**BIMS**) .

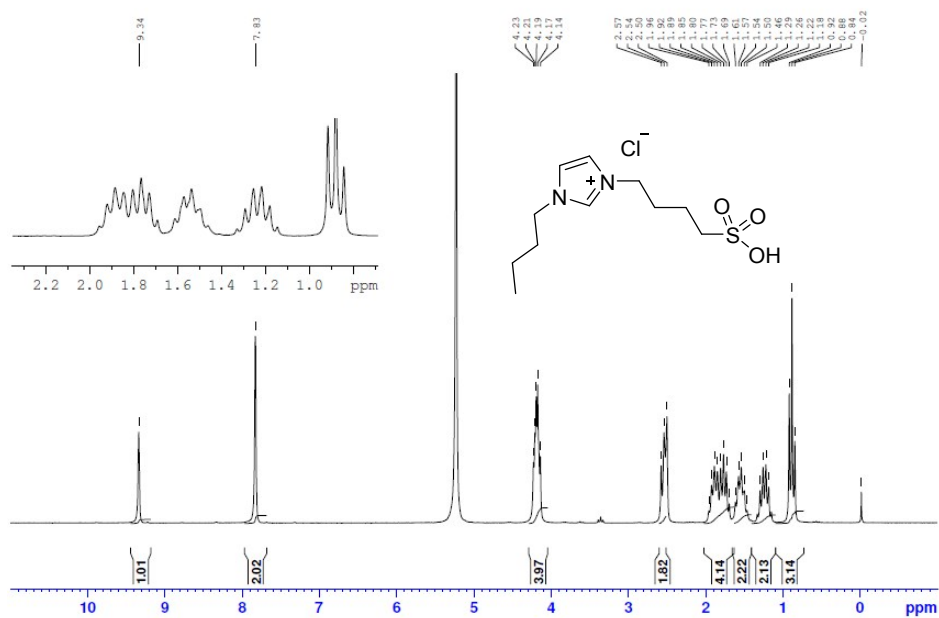

**Figure S12.**  $^1\text{H}$  spectrum of compound 1-butyl-3-(4-sulfobutyl)-1*H*-imidazol-3-ium chloride (**[BIMS][Cl]**) (200 MHz,  $\text{DMSO-}d_6$ ).

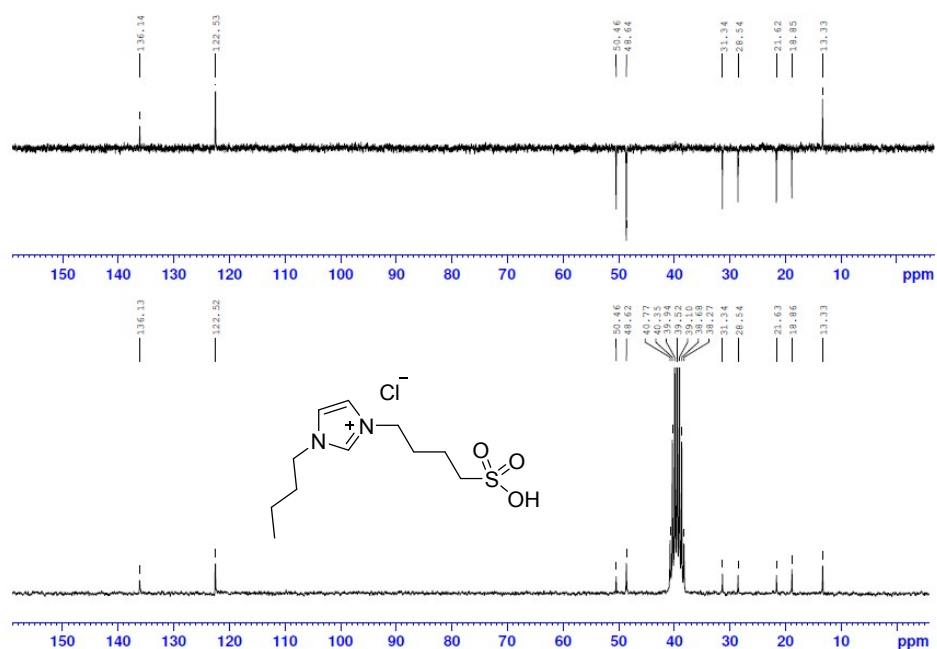

**Figure S13.**  $^{13}\text{C}$  spectrum (bottom) and DEPT 135 subspectrum of compound 1-butyl-3-(4-sulfobutyl)-1*H*-imidazol-3-ium chloride ( $[\text{BIMS}][\text{Cl}]$ ) (50 MHz,  $\text{DMSO-}d_6$ ).

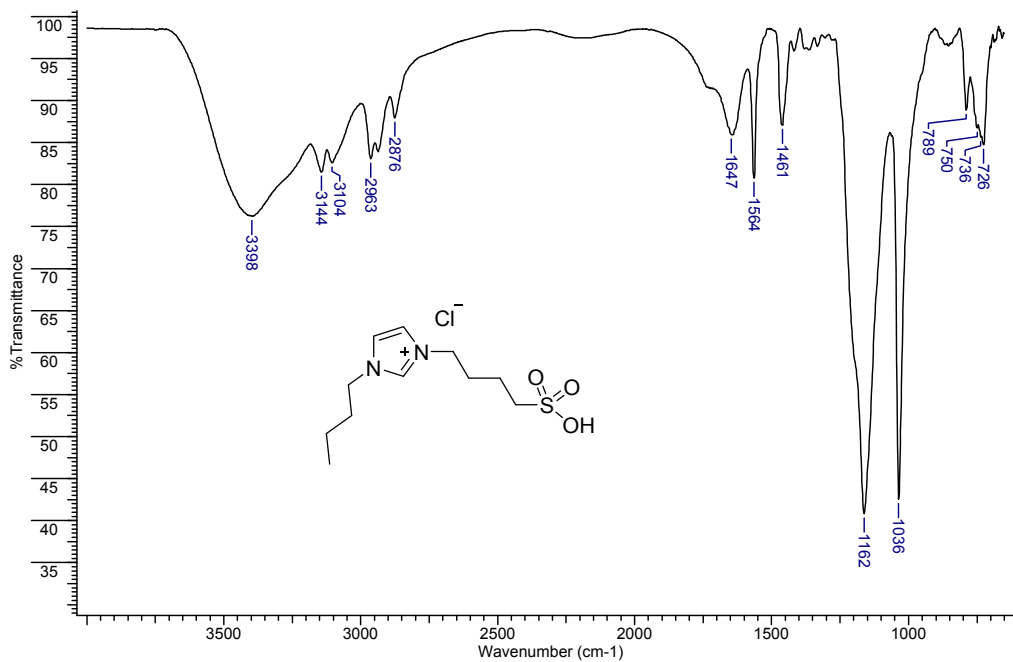

**Figure S14.** Infrared spectrum (ATR) of 1-butyl-3-(4-sulfobutyl)-1*H*-imidazol-3-ium chloride ( $[\text{BIMS}][\text{Cl}]$ ).

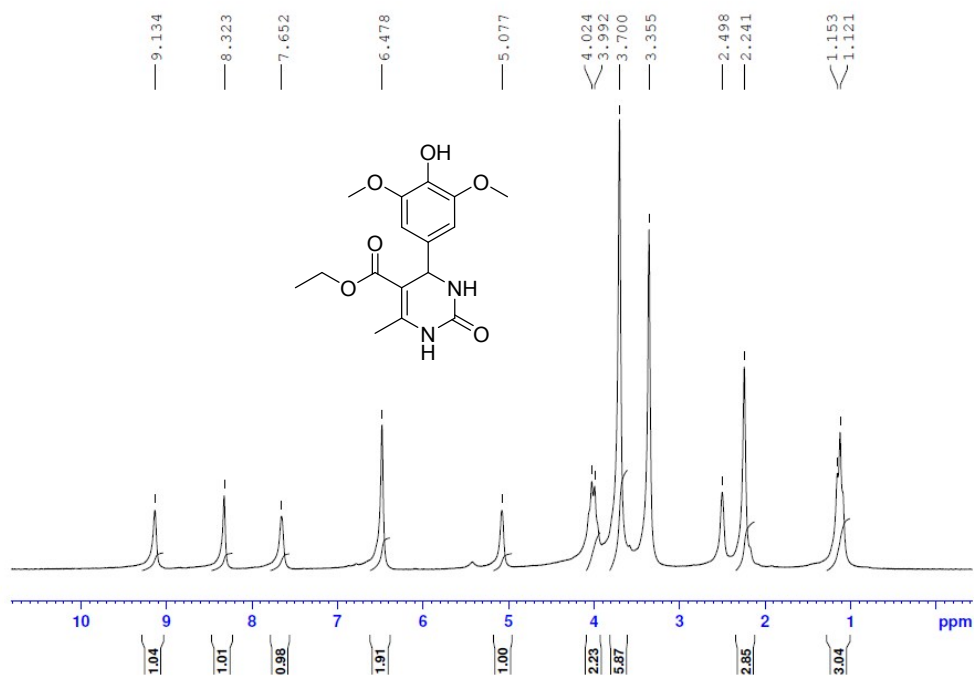

**Figure S15.**  $^1\text{H}$  spectrum of compound **BA1-O** (200 MHz,  $\text{DMSO-}d_6$ ).

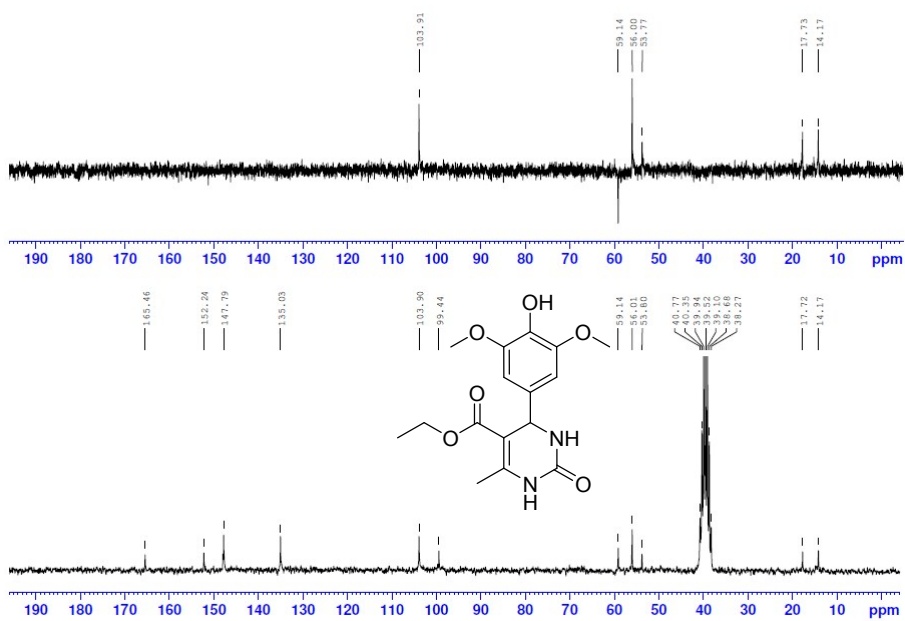

**Figure S16.**  $^{13}\text{C}$  spectrum (bottom) and DEPT 135 subspectrum of compound **BA1-O** (50 MHz,  $\text{DMSO-}d_6$ )

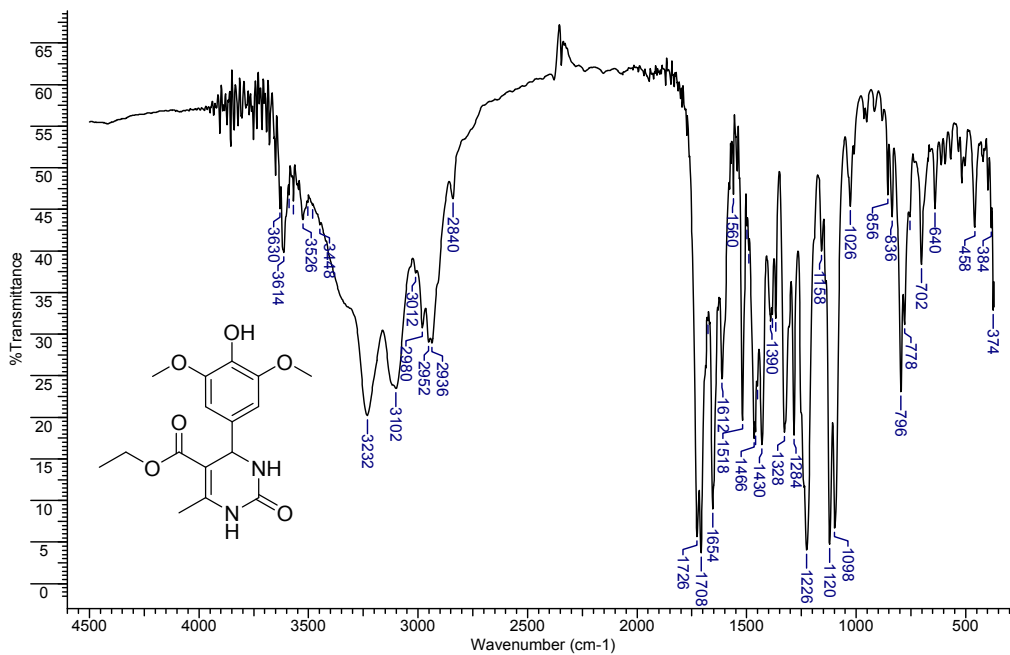

Figure S17. Infrared spectrum (KBr) of BA1-O.

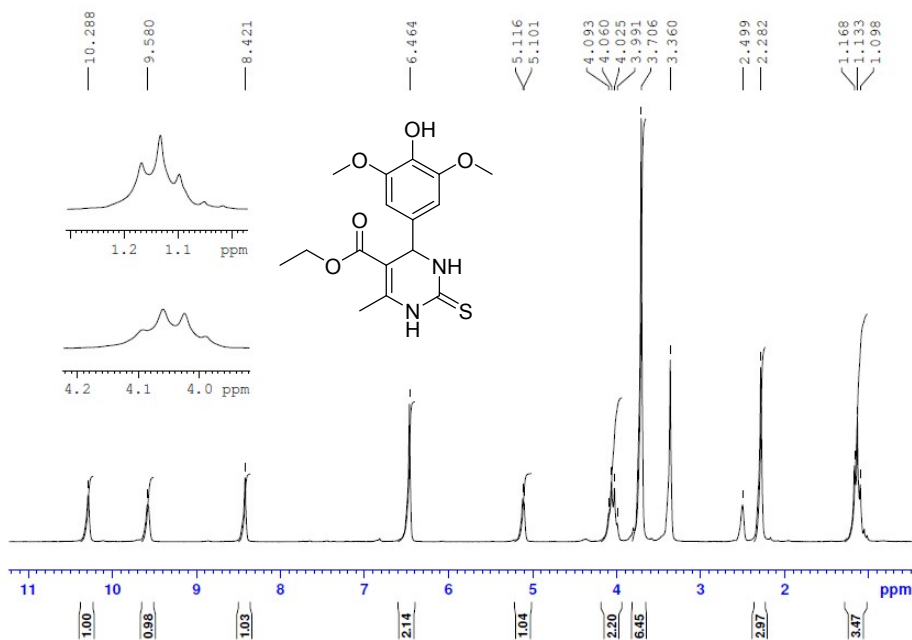

Figure S18. <sup>1</sup>H spectrum of compound BA1-S (200 MHz, DMSO-*d*<sub>6</sub>).

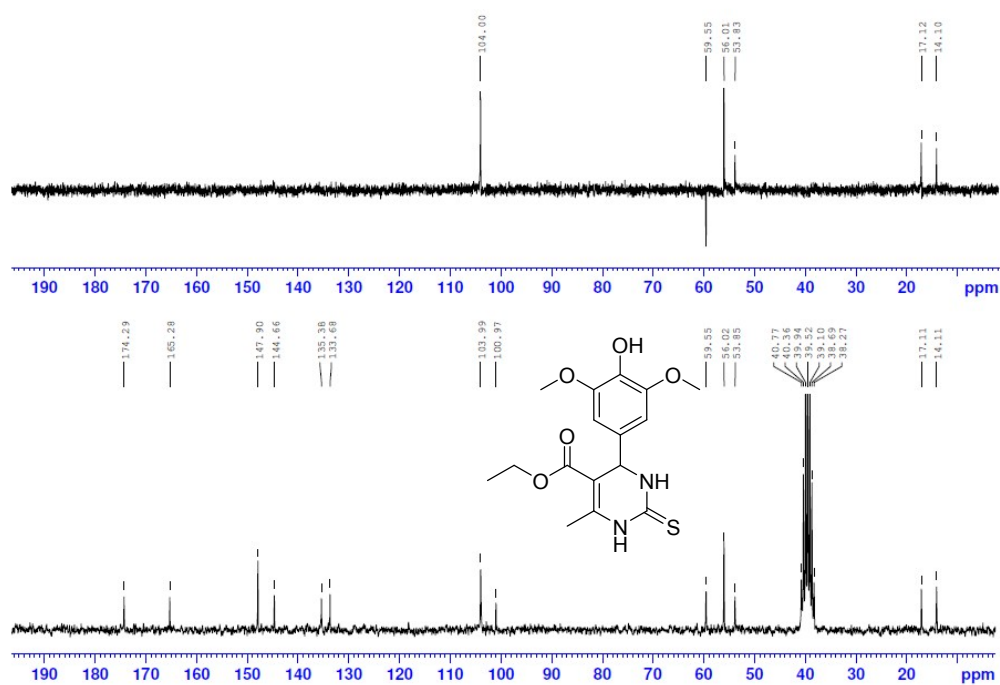

**Figure S19.**  $^{13}\text{C}$  spectrum (bottom) and DEPT 135 subspectrum of compound BA1-S (50 MHz,  $\text{DMSO-}d_6$ ).

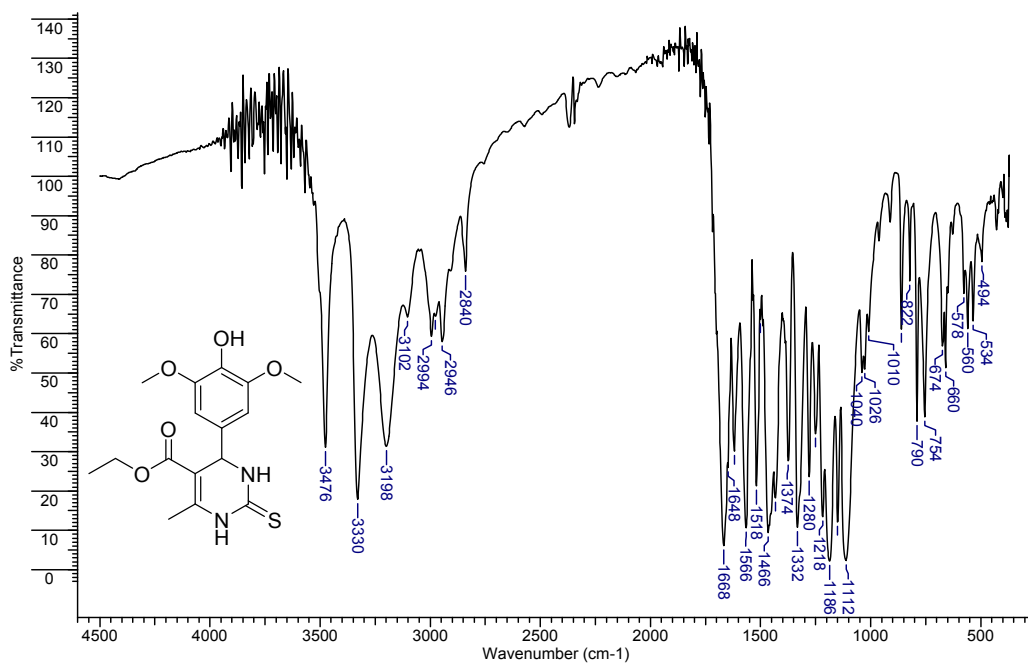

**Figure S20.** Infrared spectrum (KBr) of BA1-S.

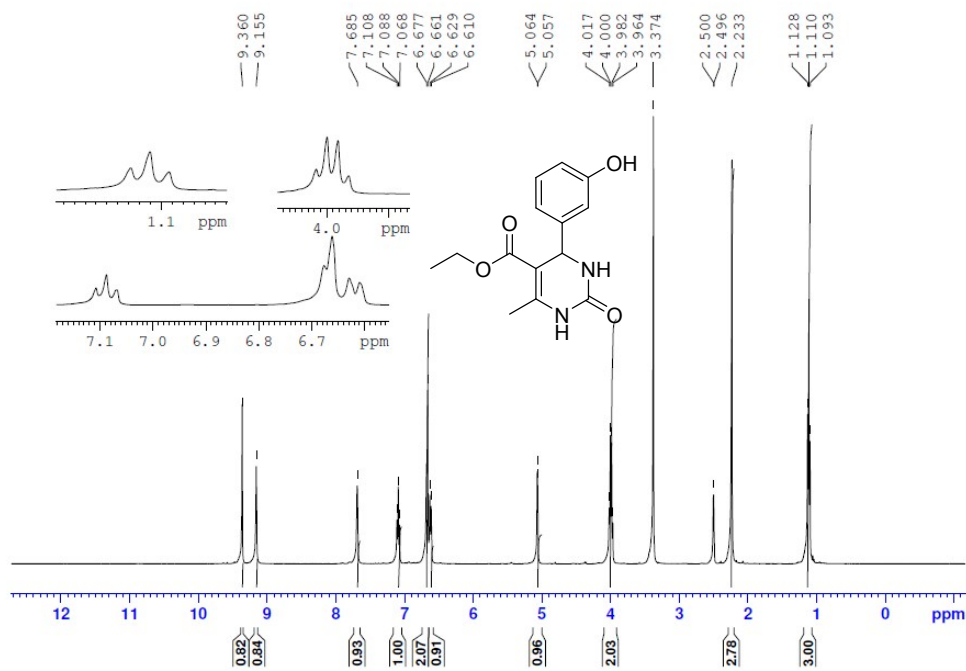

**Figure S21.**  $^1\text{H}$  spectrum of compound **BA2-O** (400 MHz,  $\text{DMSO-}d_6$ ).

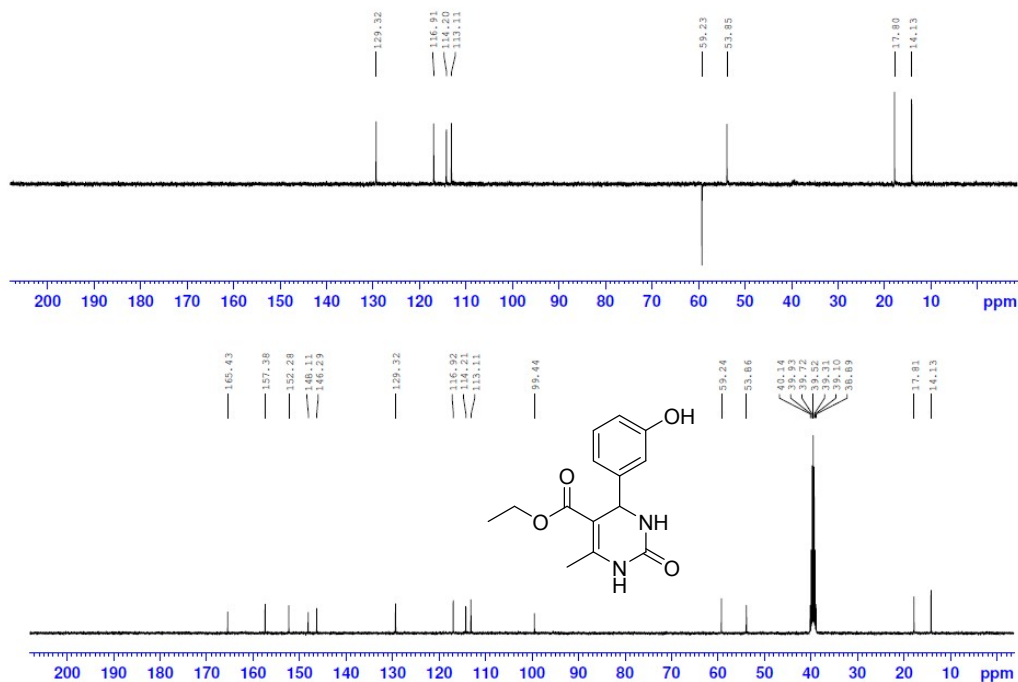

**Figure S22.**  $^{13}\text{C}$  spectrum (bottom) and DEPT 135 subspectrum of compound **BA2-O** (100 MHz,  $\text{DMSO-}d_6$ ).



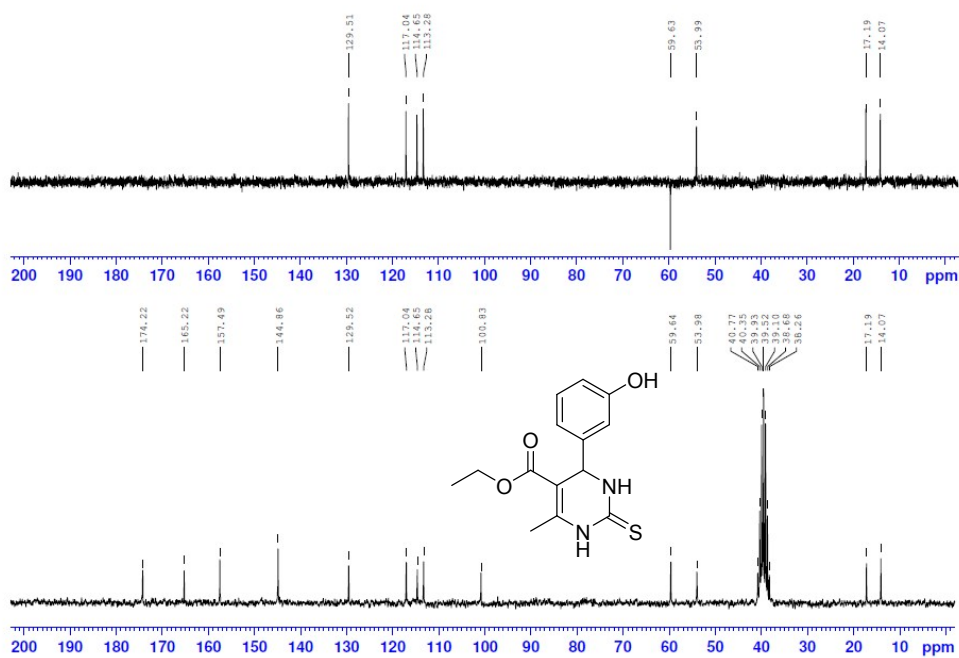

**Figure S25.**  $^{13}\text{C}$  spectrum (bottom) and DEPT 135 subspectrum of compound BA2-S (50 MHz,  $\text{DMSO-}d_6$ ).

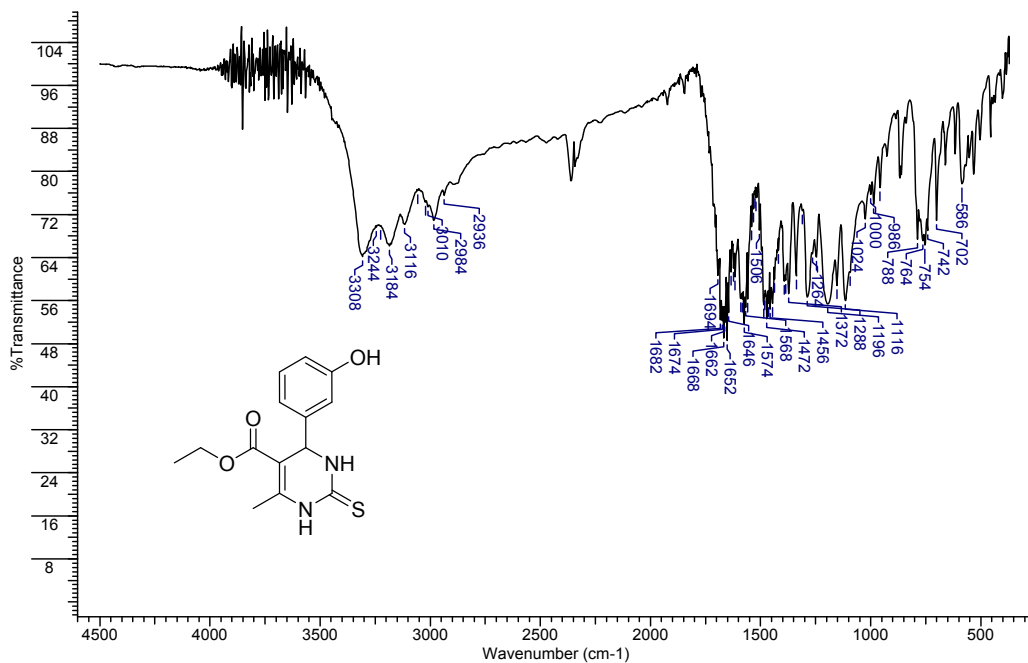

**Figure S26.** Infrared spectrum (KBr) of BA2-S.



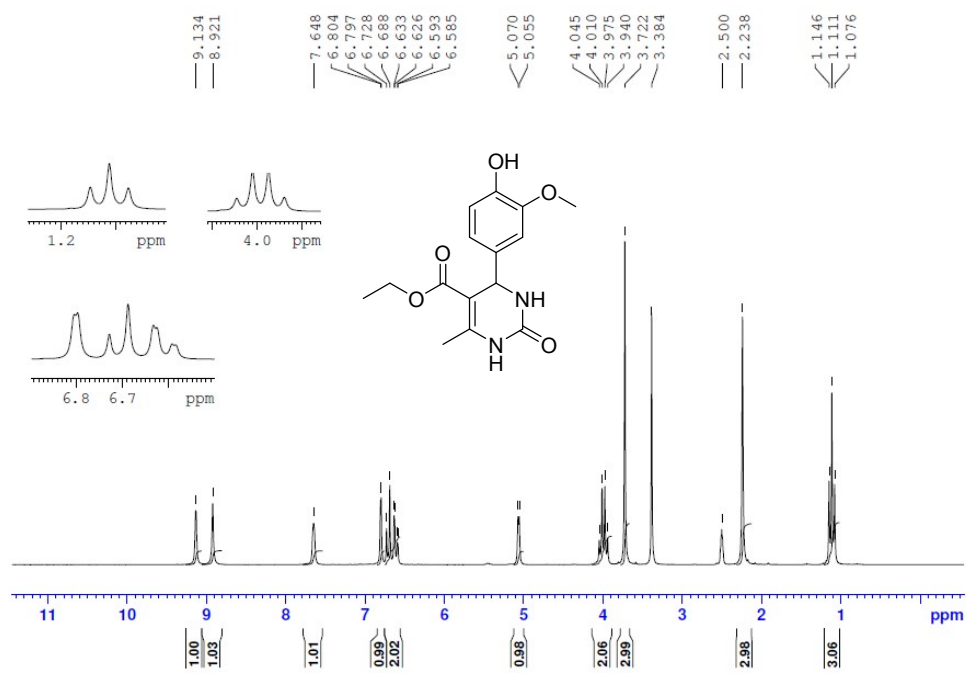

**Figure S27.** <sup>1</sup>H spectrum of compound BA3-O (200 MHz, DMSO-*d*<sub>6</sub>).

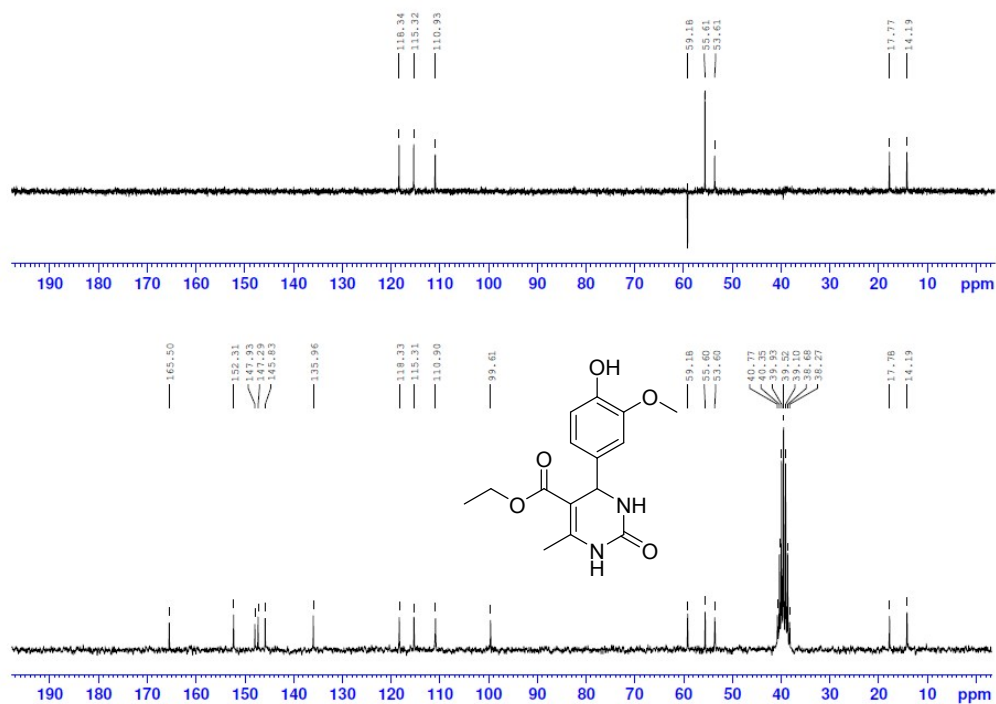

**Figure S28.** <sup>13</sup>C spectrum (bottom) and DEPT 135 subspectrum of compound BA3-O (50 MHz, DMSO-*d*<sub>6</sub>).

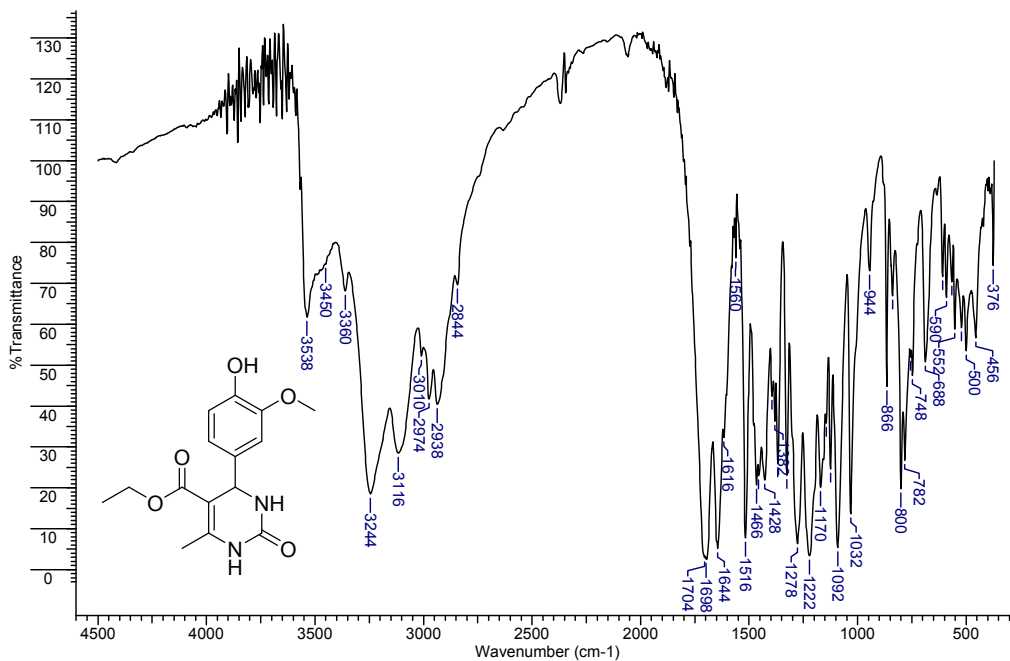

**Figure S29.** Infrared spectrum (KBr) of **BA3-O**.

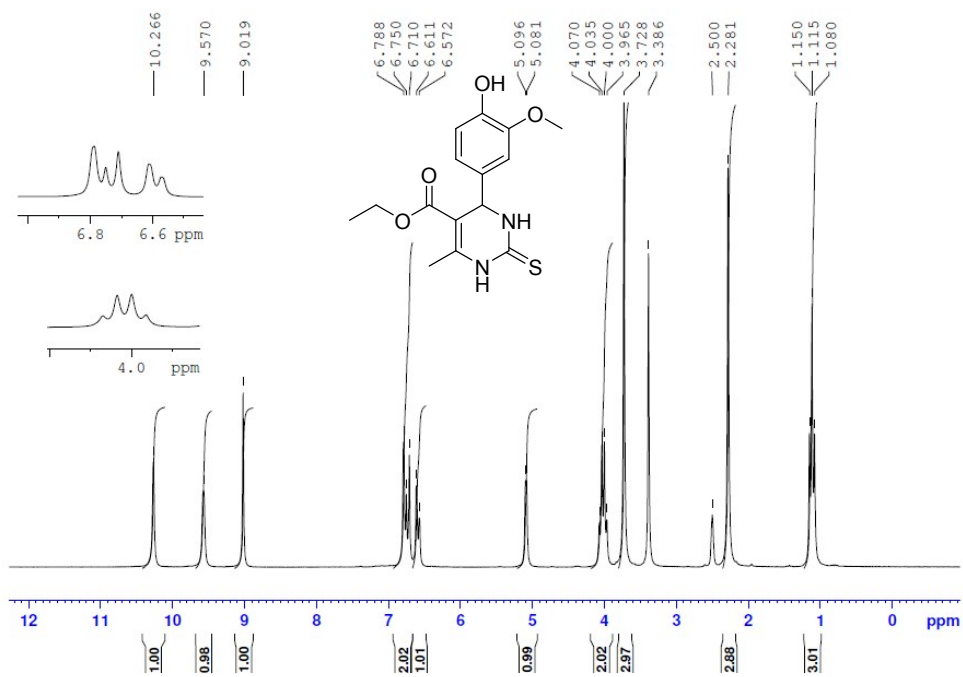

**Figure S30.**  $^1\text{H}$  spectrum of compound **BA3-S** (200 MHz,  $\text{DMSO-}d_6$ ).

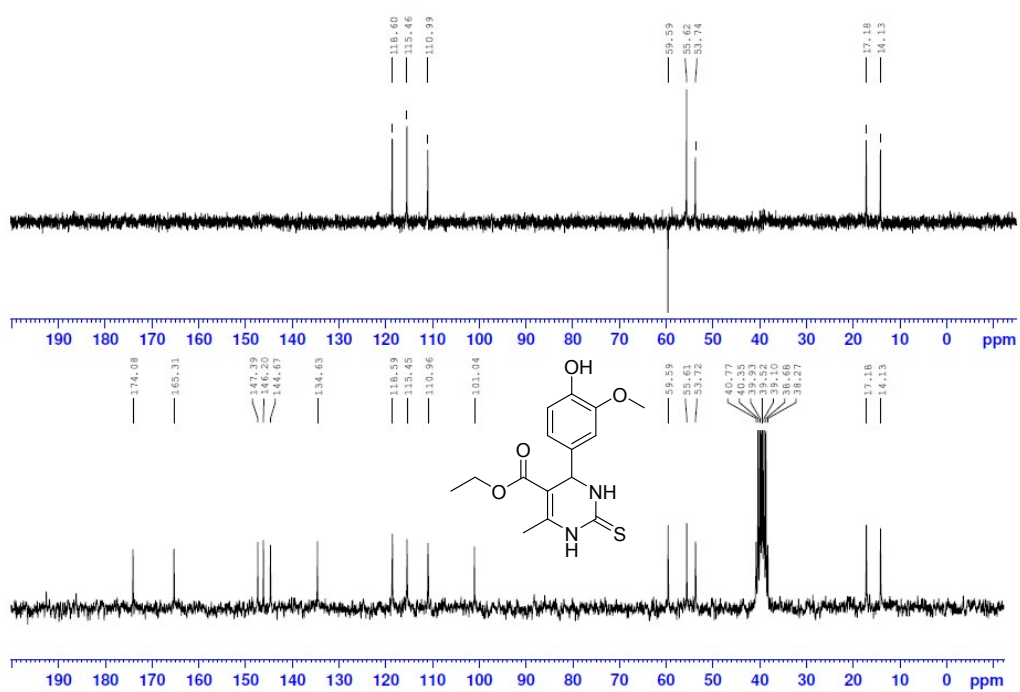

**Figure S31.**  $^{13}\text{C}$  spectrum (bottom) and DEPT 135 subspectrum of compound BA3-S (50 MHz, DMSO- $d_6$ ).

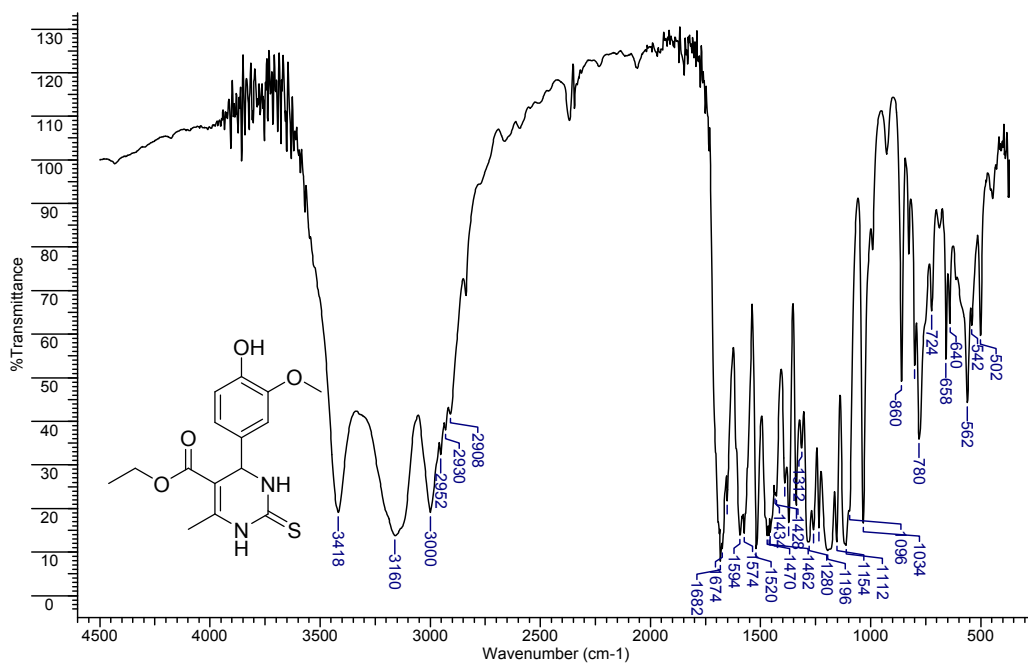

**Figure S32.** Infrared spectrum (KBr) of BA3-S.

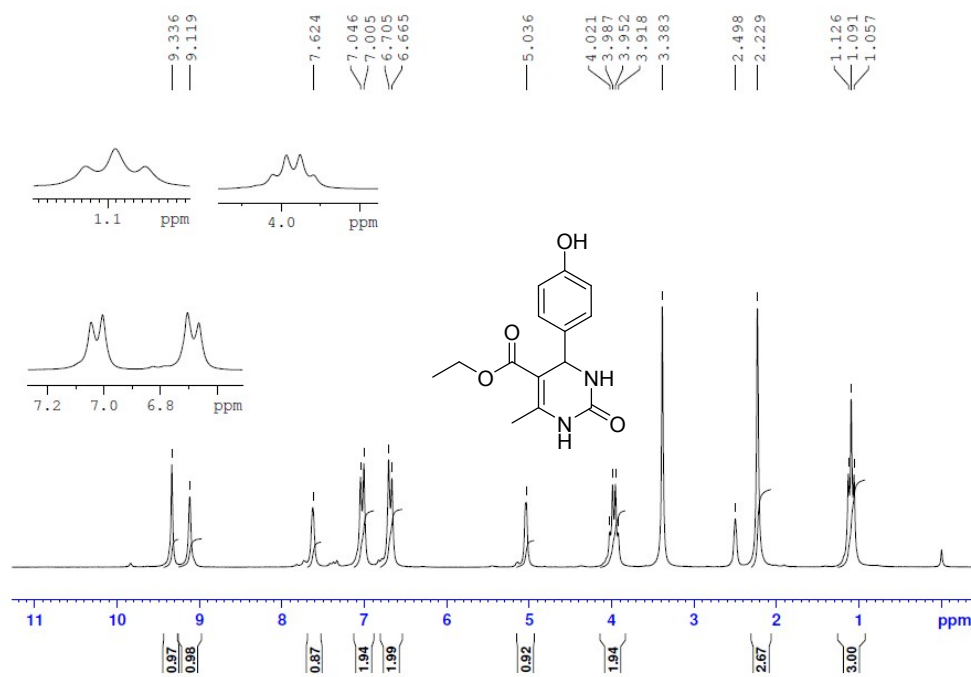

**Figure S33.** <sup>1</sup>H spectrum of compound **BA4-O** (200 MHz, DMSO-*d*<sub>6</sub>).

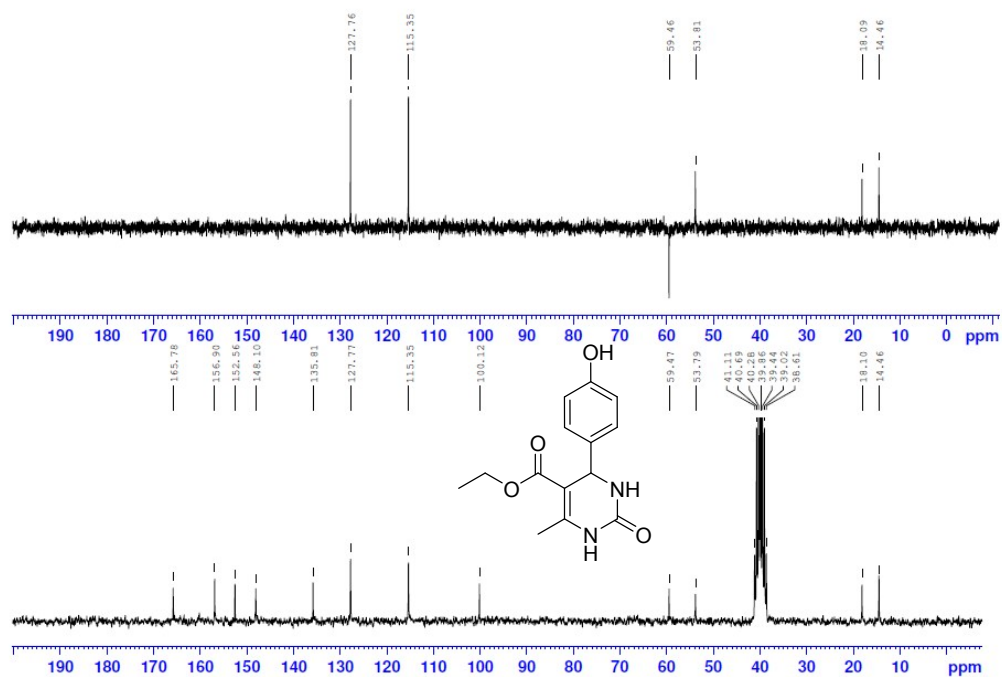

**Figure S34.** <sup>13</sup>C spectrum (bottom) and DEPT 135 subspectrum of compound **BA4-O** (50 MHz, DMSO-*d*<sub>6</sub>).

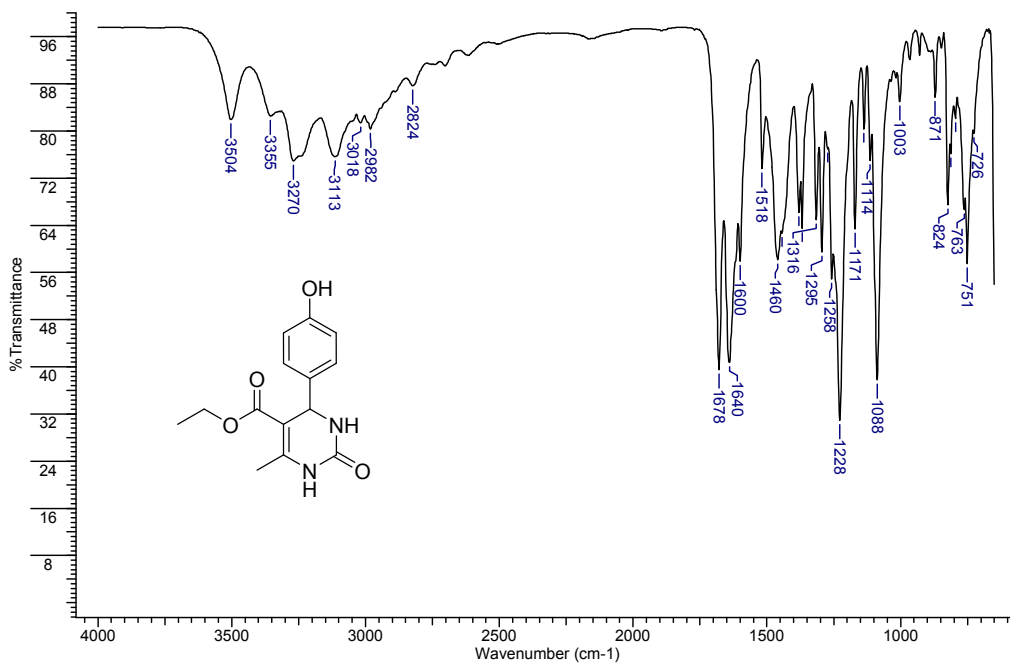

Figure S35. Infrared spectrum (ATR) of BA4-O.

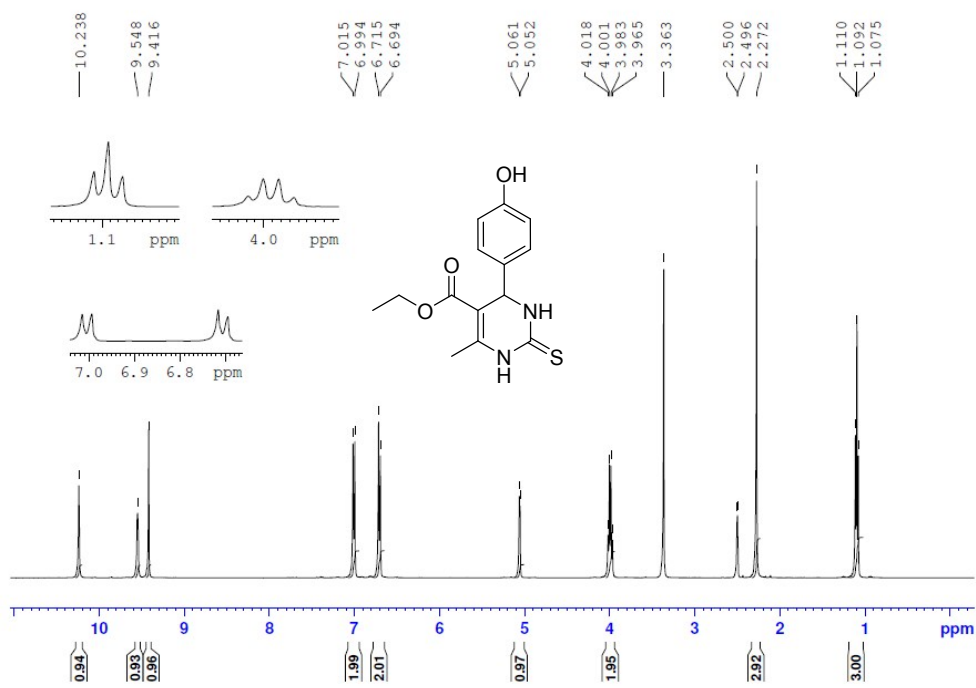

Figure S36. <sup>1</sup>H spectrum of compound BA4-S (200 MHz, DMSO-*d*<sub>6</sub>).

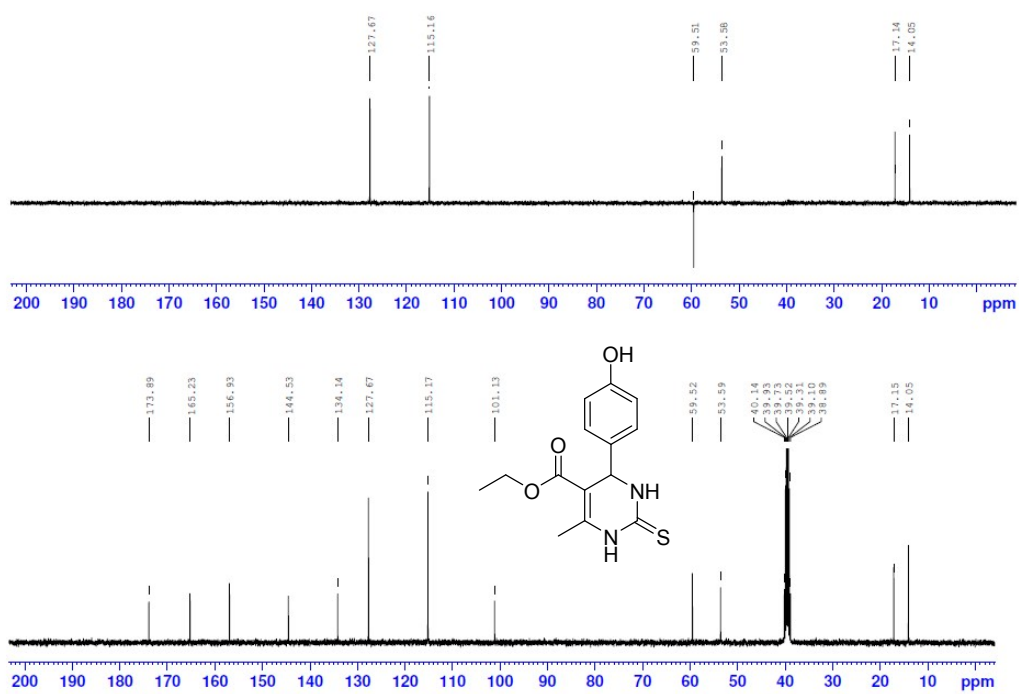

**Figure S37.**  $^{13}\text{C}$  spectrum (bottom) and DEPT 135 subspectrum of compound BA4-S (50 MHz,  $\text{DMSO-}d_6$ ).

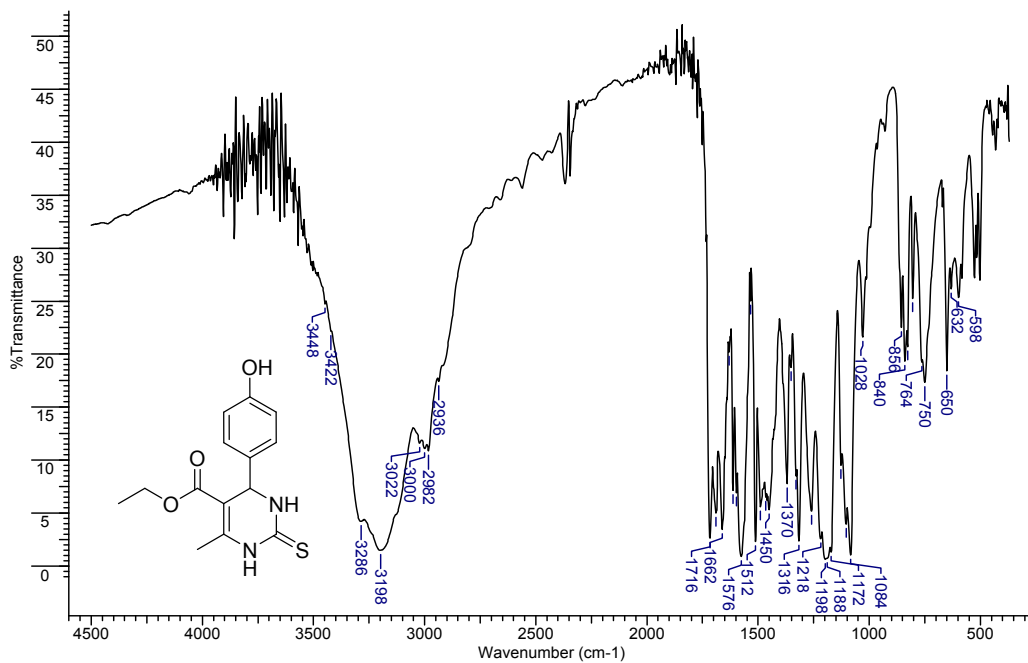

**Figure S38.** Infrared spectrum (KBr) of BA4-S.

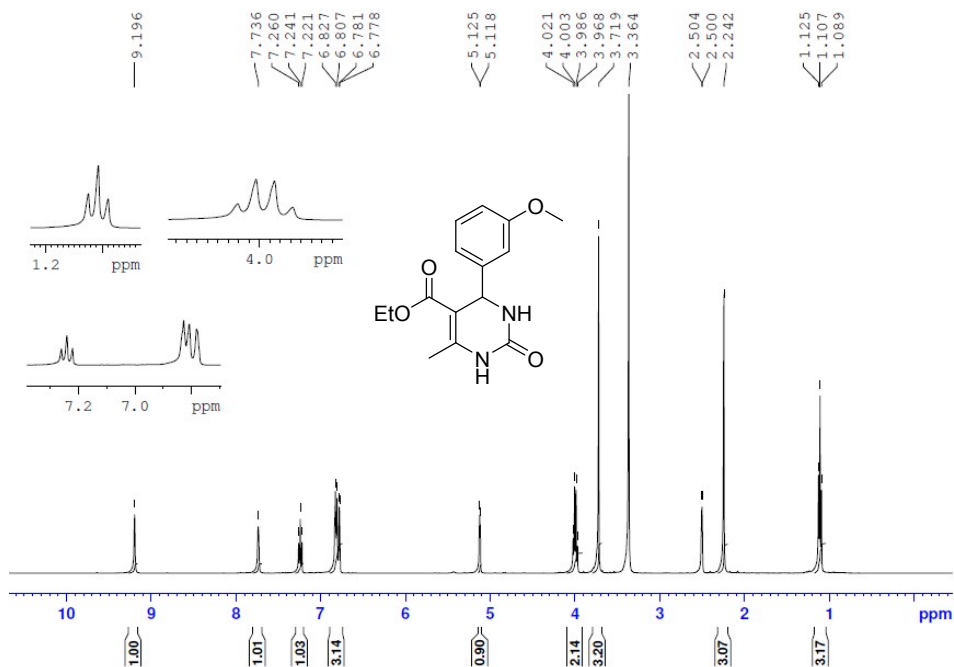

**Figure S39.** <sup>1</sup>H spectrum of compound **BA5-O** (200 MHz, DMSO-*d*<sub>6</sub>).

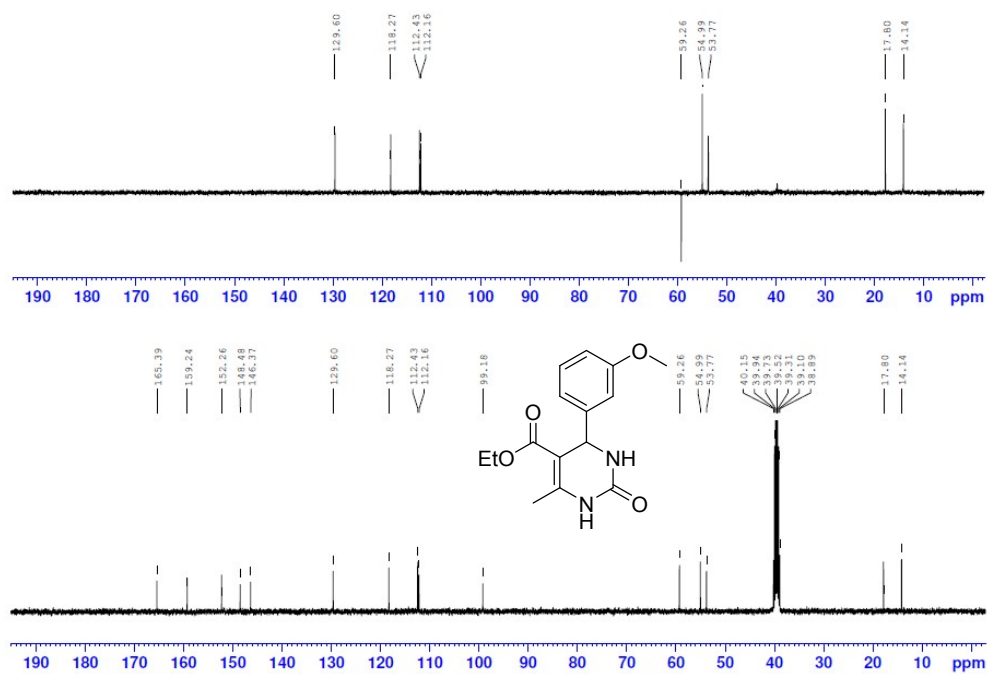

**Figure S40.** <sup>13</sup>C spectrum (bottom) and DEPT 135 subspectrum of compound **BA5-O** (50 MHz, DMSO-*d*<sub>6</sub>).

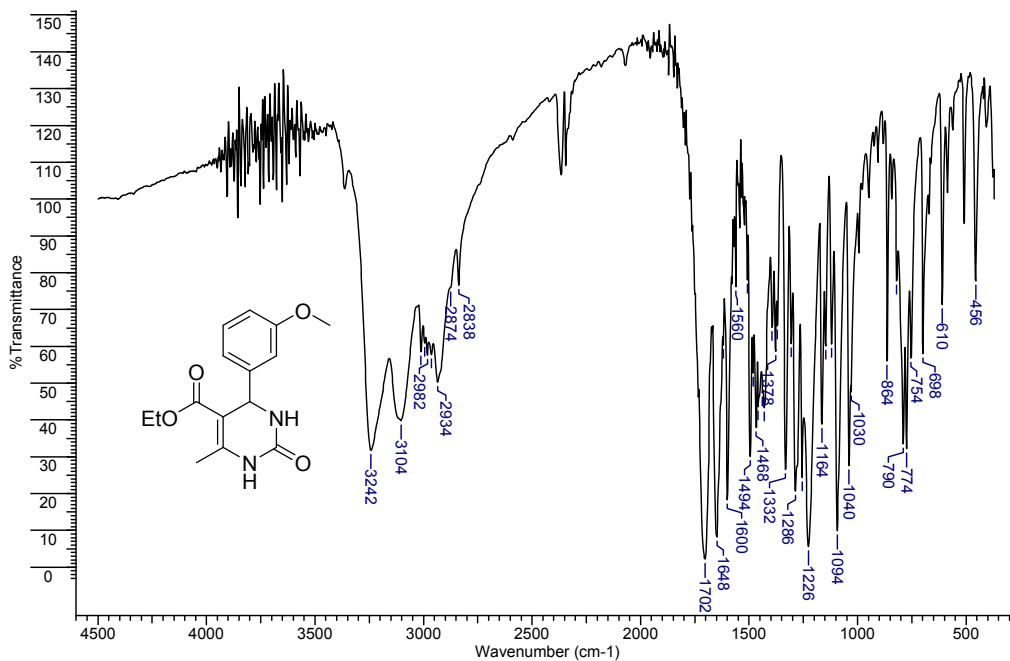

**Figure S41.** Infrared spectrum (KBr) of BA5-O.

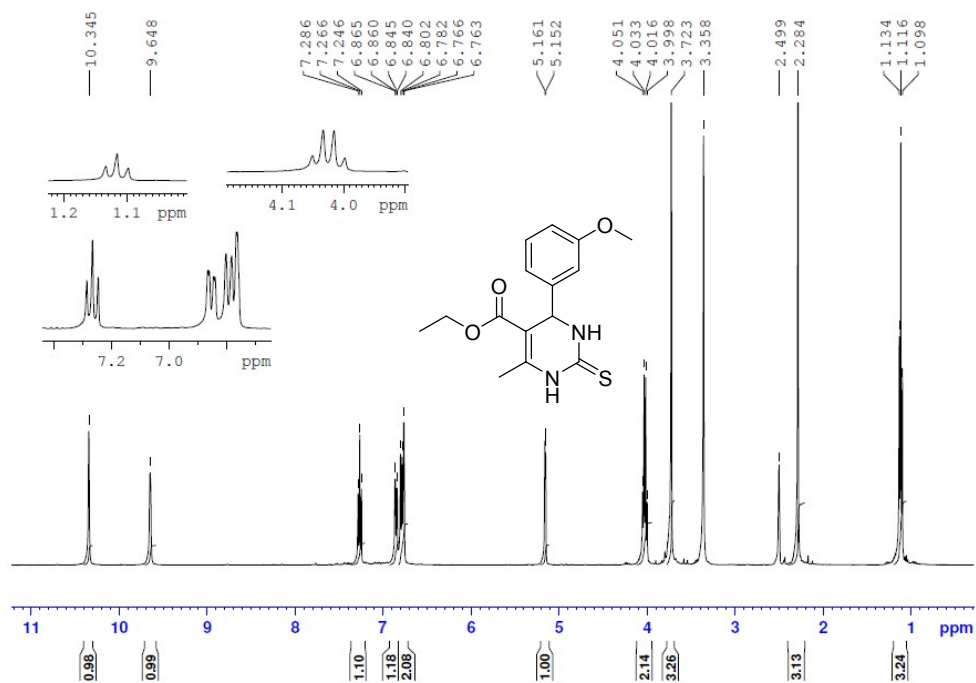

**Figure S42.**  $^1\text{H}$  spectrum of compound BA5-S (200 MHz,  $\text{DMSO-}d_6$ ).



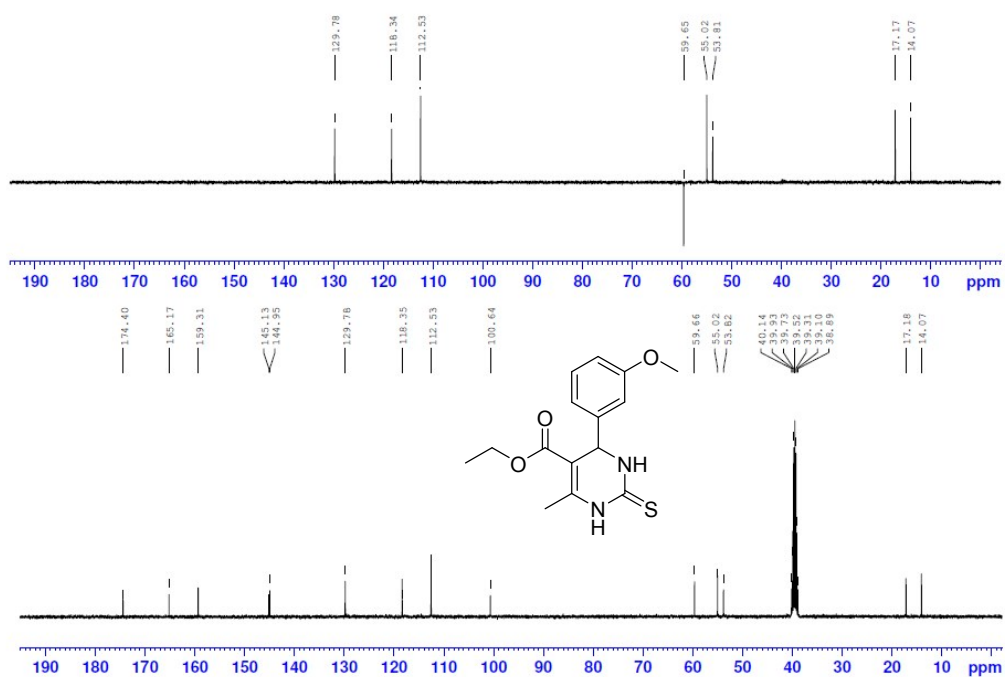

**Figure S43.**  $^{13}\text{C}$  spectrum (bottom) and DEPT 135 subspectrum of compound BA5-S (50 MHz, DMSO- $d_6$ ).

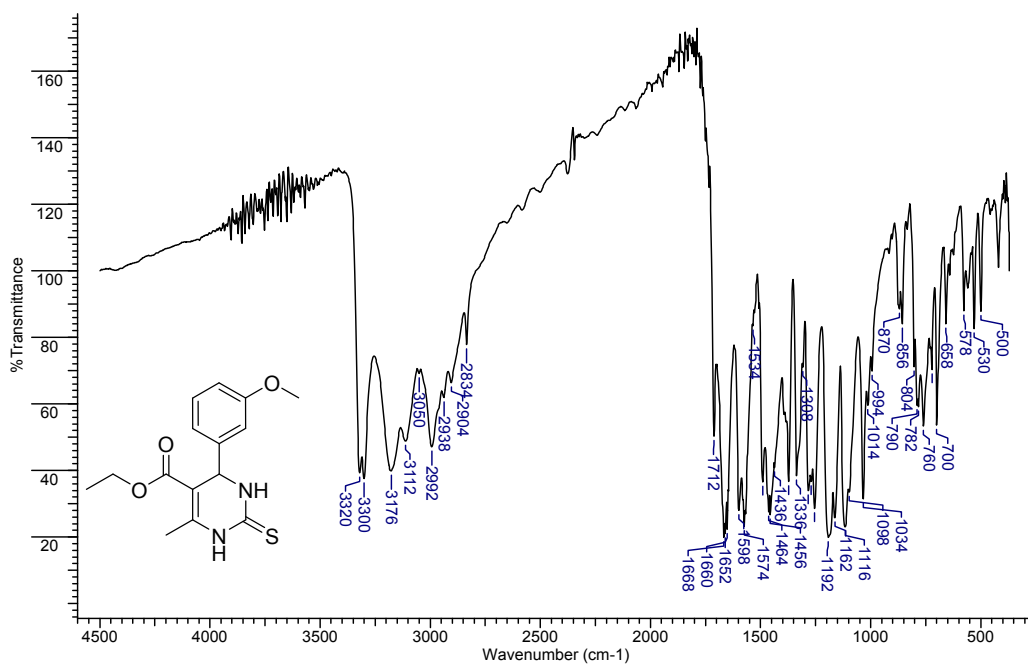

**Figure S44.** Infrared spectrum (KBr) of BA5-S.

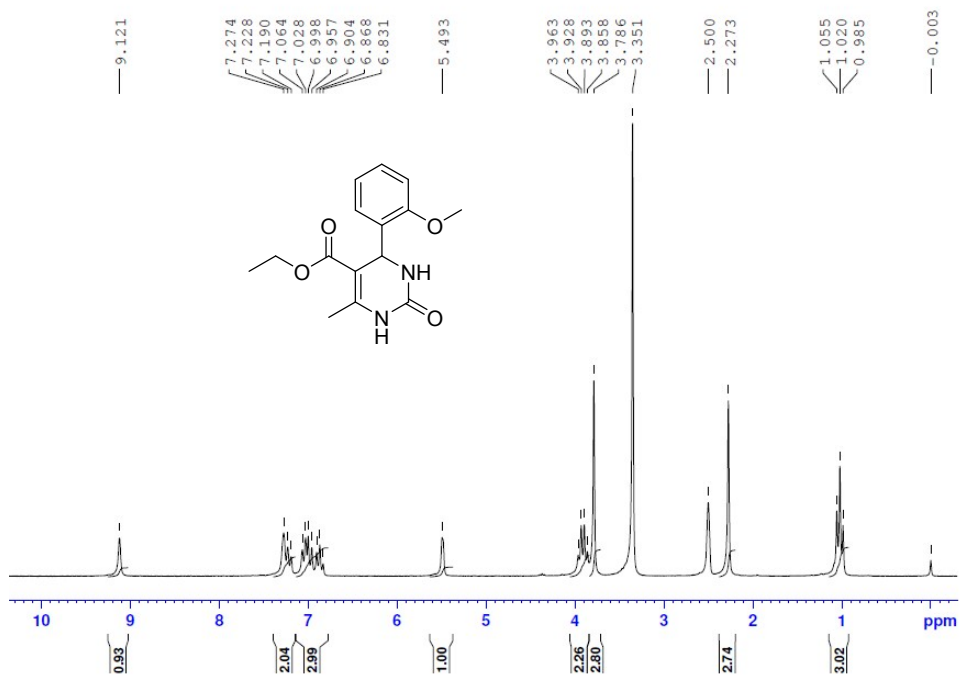

**Figure S45.**  $^1\text{H}$  spectrum of compound BA6-O (200 MHz,  $\text{DMSO-}d_6$ ).

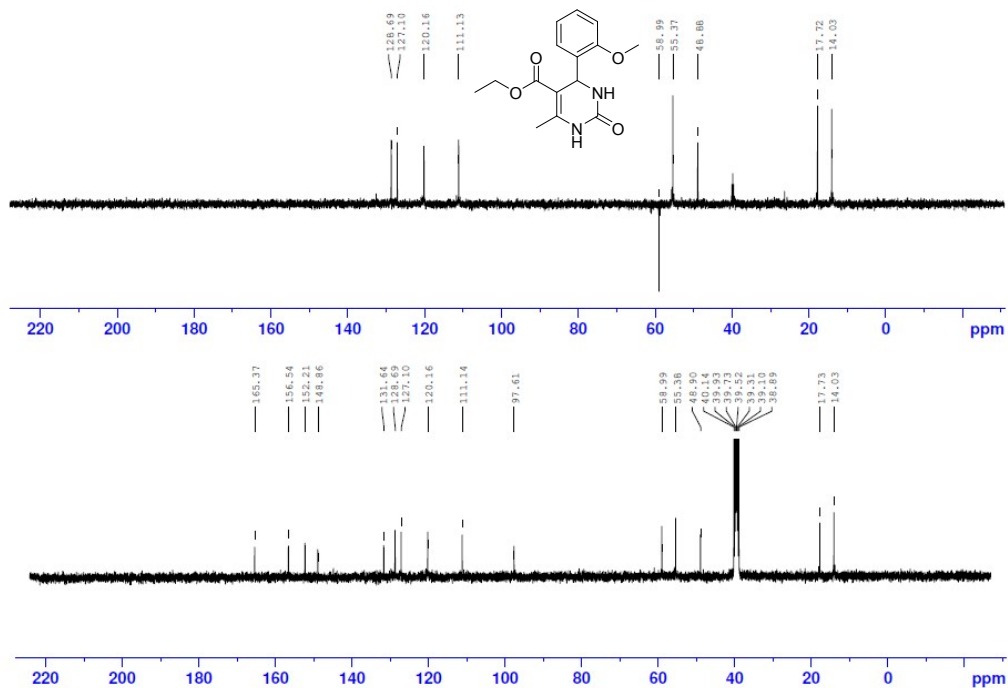

**Figure S46.**  $^{13}\text{C}$  spectrum (bottom) and DEPT 135 subspectrum of compound BA6-O (50 MHz,  $\text{DMSO-}d_6$ )



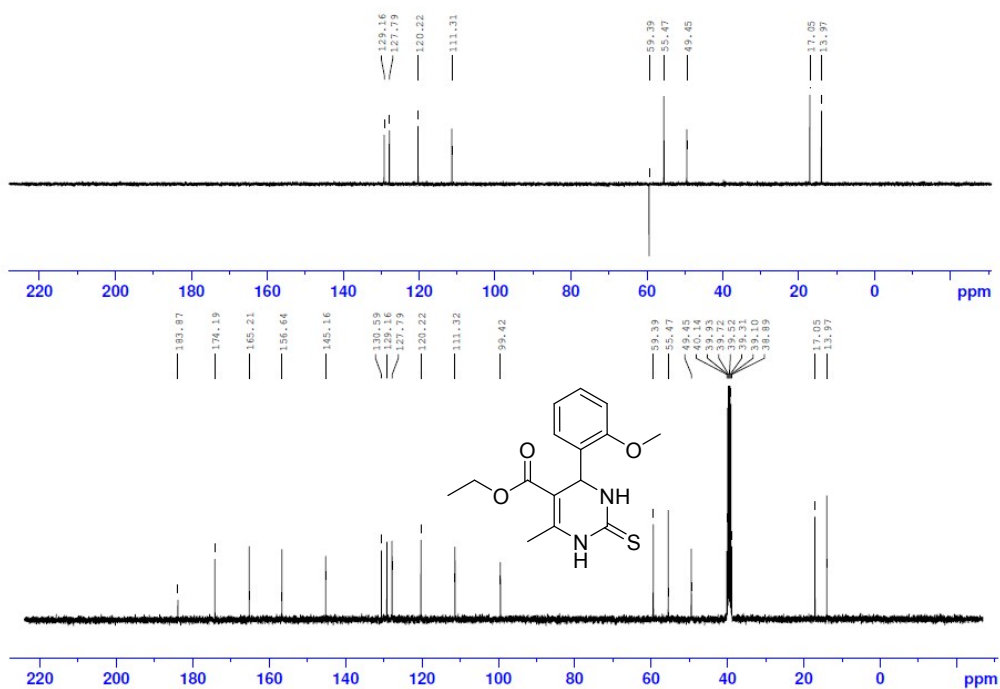

**Figure S49.**  $^{13}\text{C}$  spectrum (bottom) and DEPT 135 subspectrum of compound BA6-S (100 MHz,  $\text{DMSO-}d_6$ ).

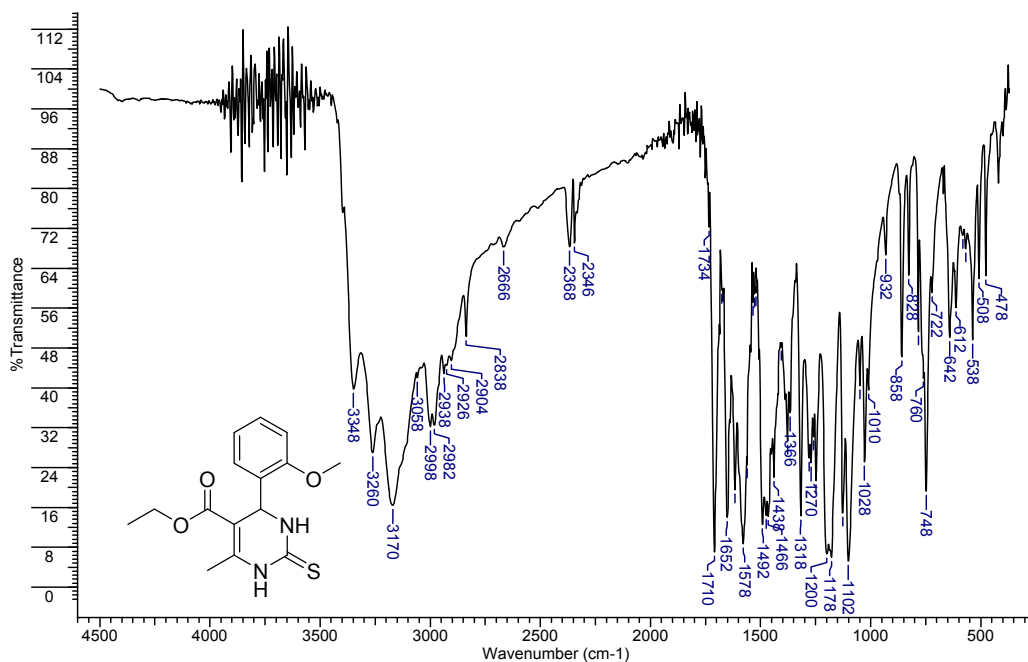

**Figure S50.** Infrared spectrum (KBr) of BA6-S.

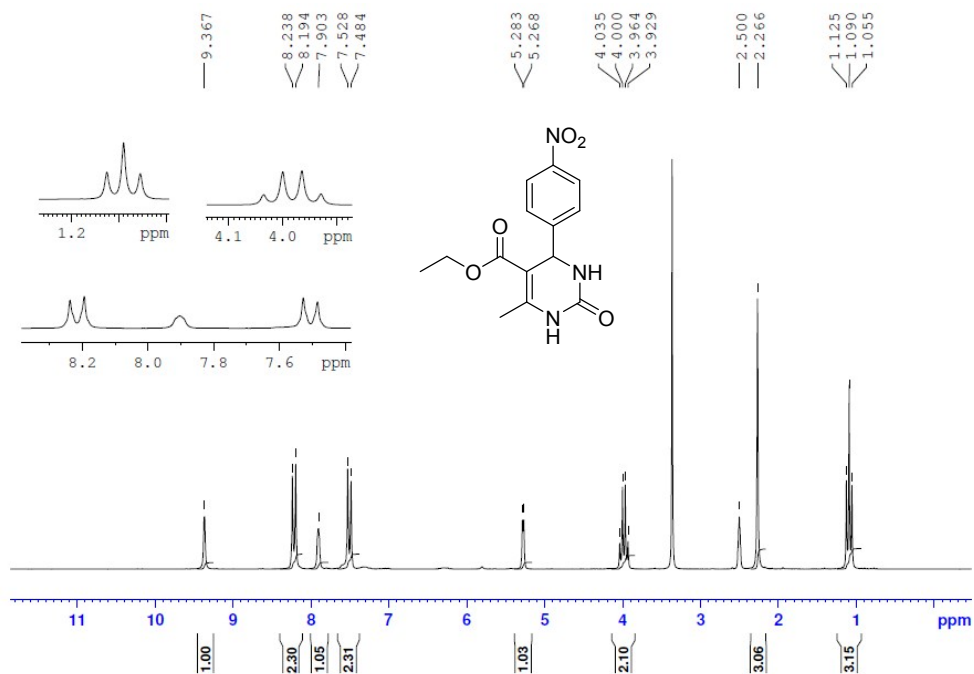

**Figure S51.** <sup>1</sup>H spectrum of compound BA7-O (200 MHz, DMSO-*d*<sub>6</sub>).

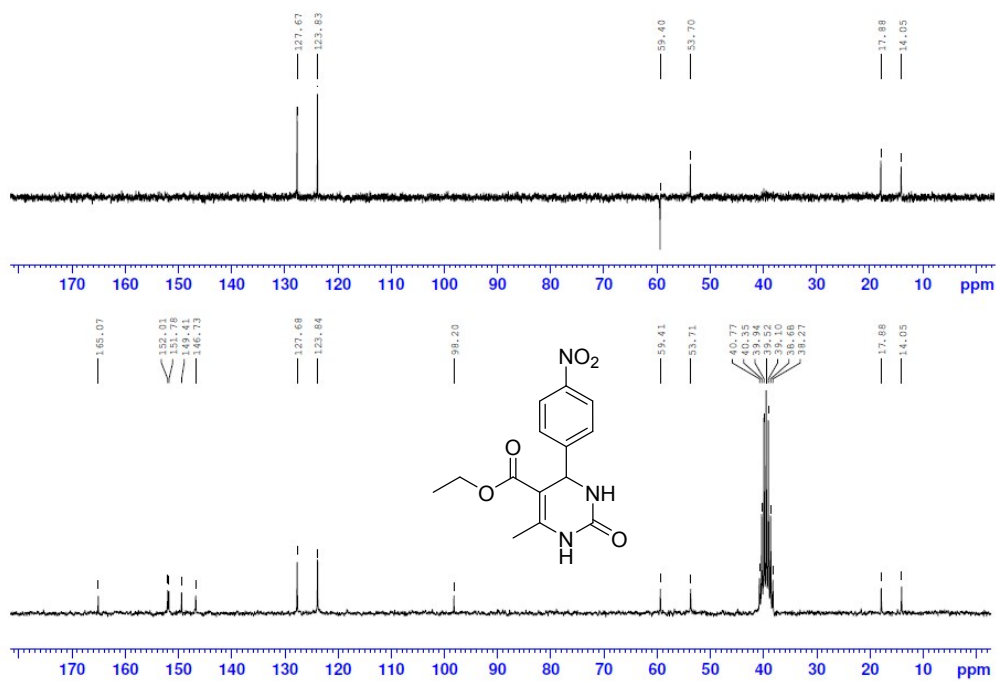

**Figure S52.** <sup>13</sup>C spectrum (bottom) and DEPT 135 subspectrum of compound BA7-O (50 MHz, DMSO-*d*<sub>6</sub>).

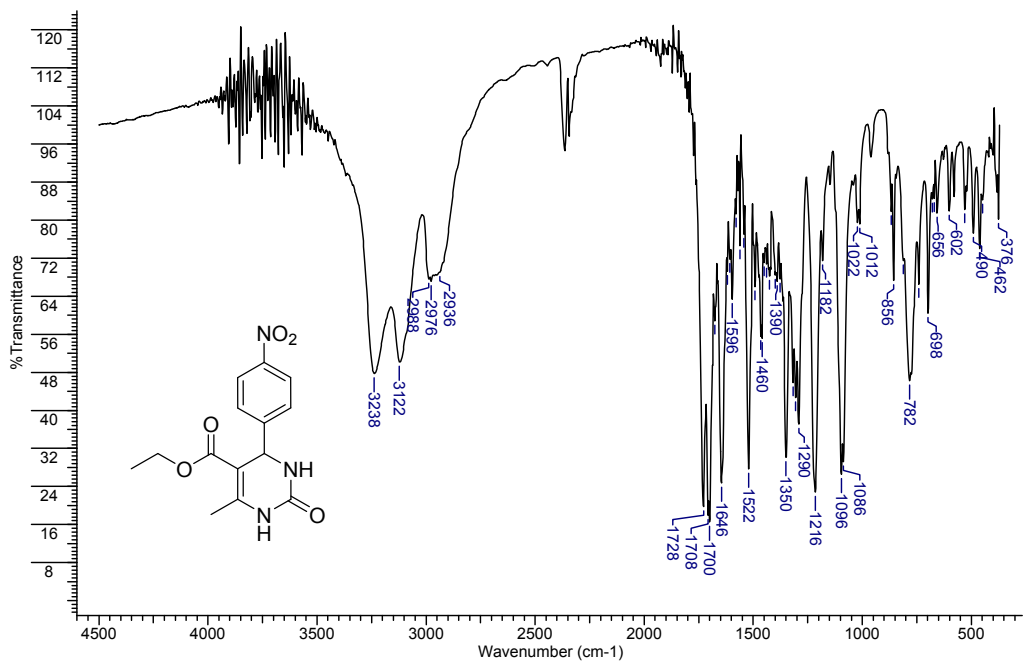

**Figure S53.** Infrared spectrum (KBr) of BA7-O.

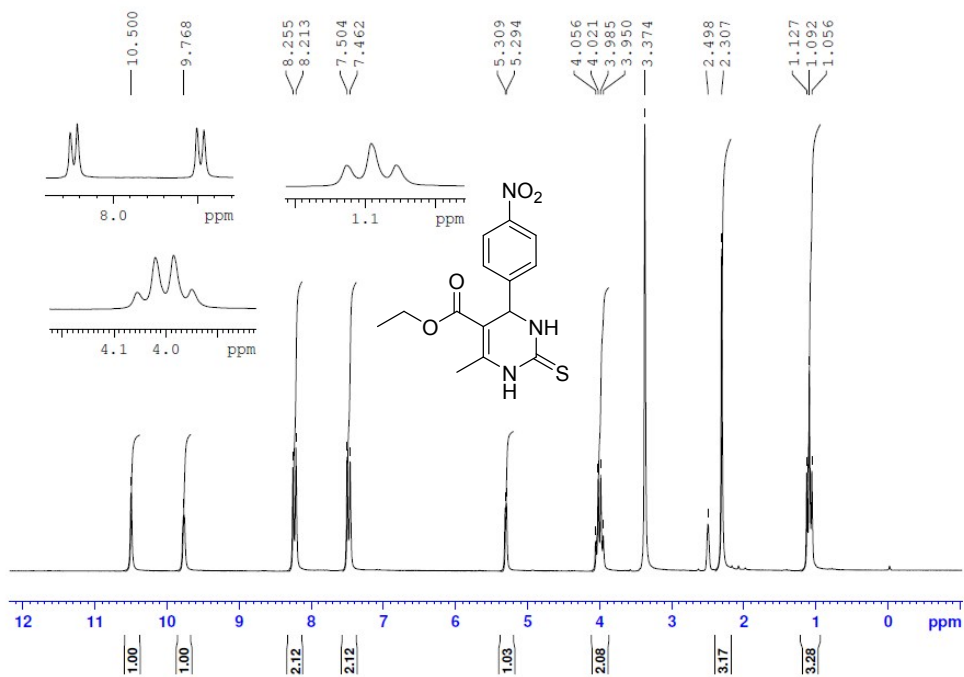

**Figure S54.**  $^1\text{H}$  spectrum of compound BA7-S (200 MHz,  $\text{DMSO-}d_6$ ).

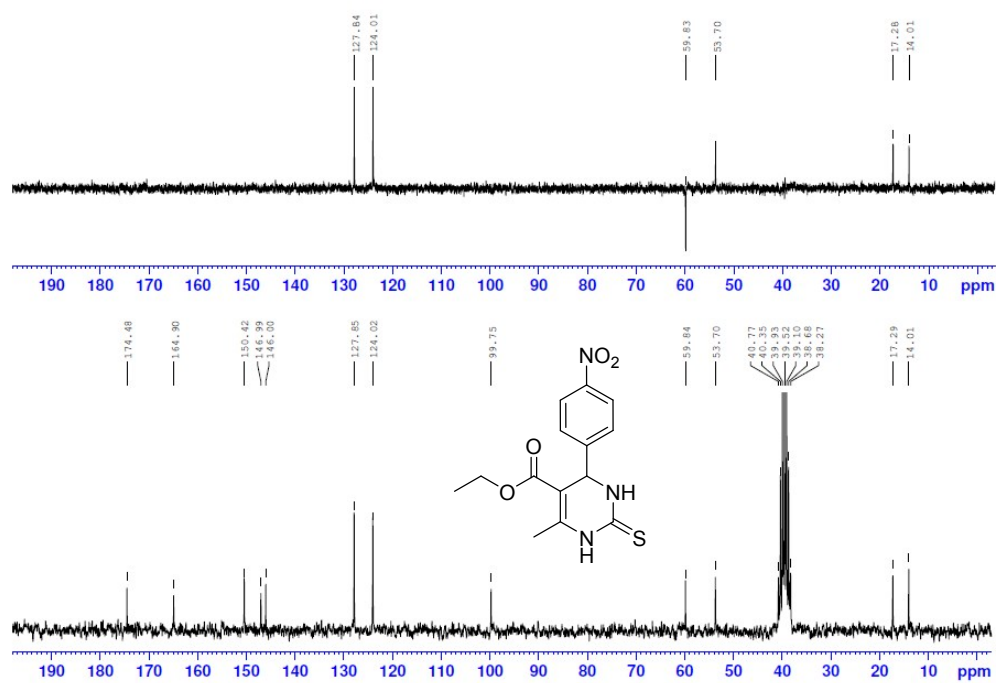

**Figure S55.**  $^{13}\text{C}$  spectrum (bottom) and DEPT 135 subspectrum of compound **BA7-S** (50 MHz,  $\text{DMSO-}d_6$ ).

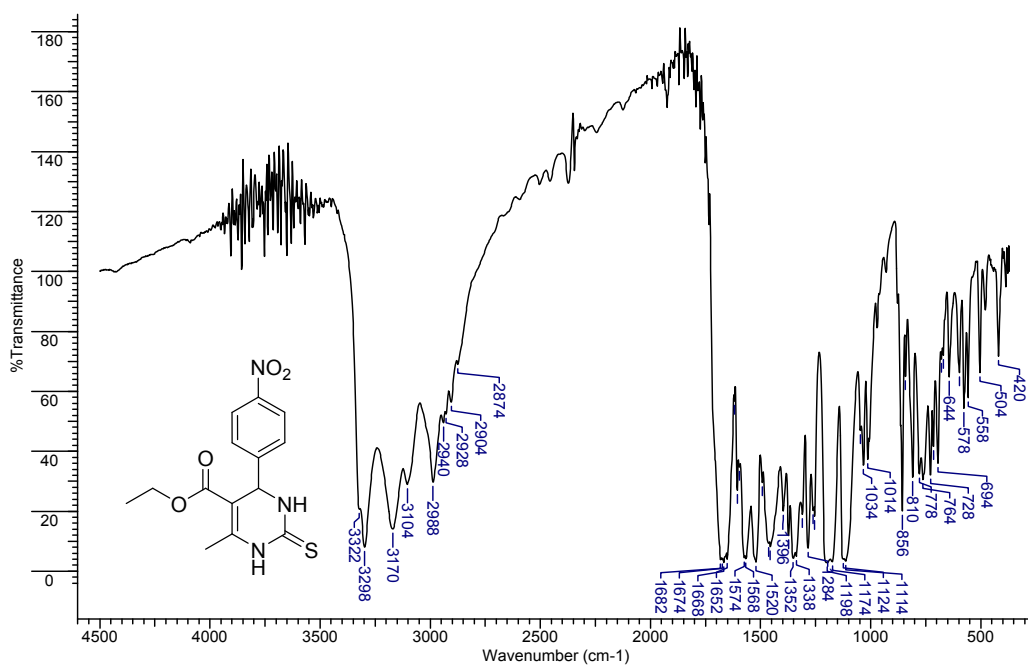

**Figure S56.** Infrared spectrum (KBr) of **BA7-S**.

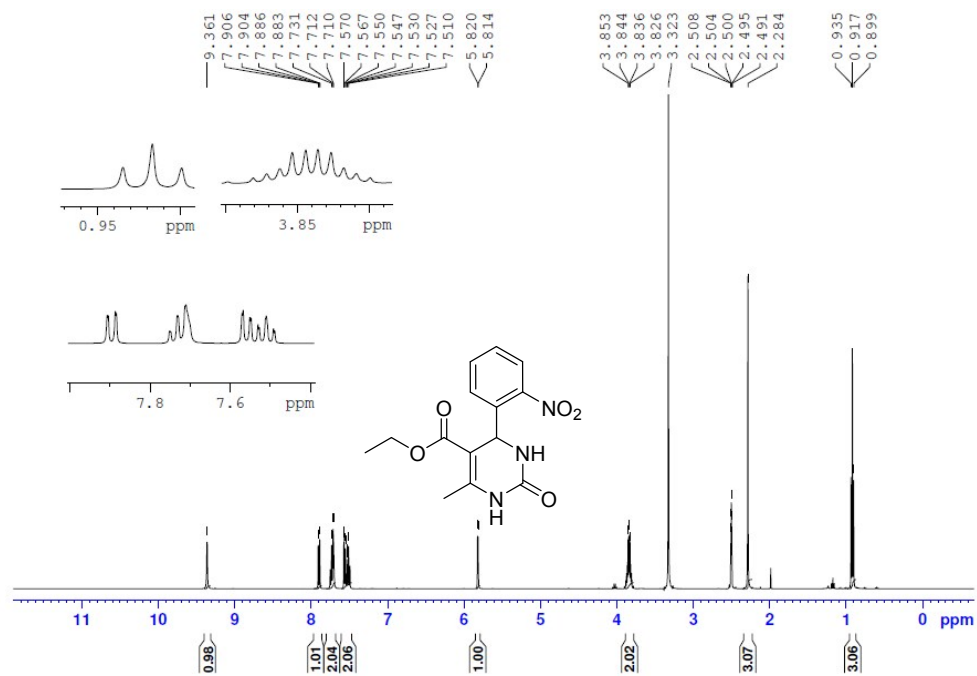

**Figure S57.** <sup>1</sup>H spectrum of compound BA8-O (400 MHz, DMSO-*d*<sub>6</sub>).

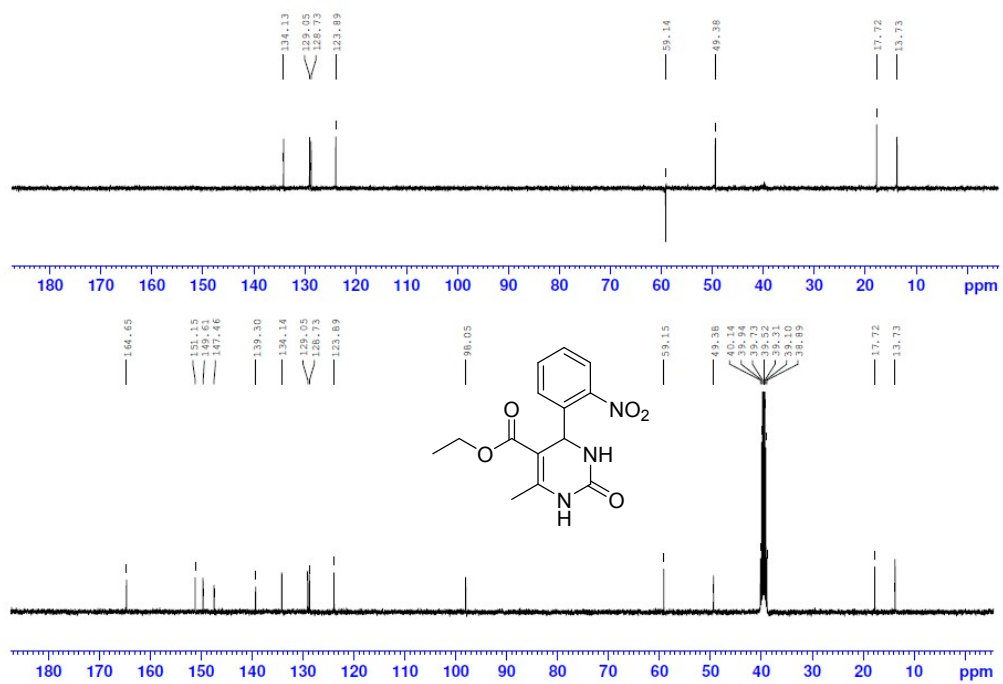

**Figure S58.** <sup>13</sup>C spectrum (bottom) and DEPT 135 subspectrum of compound BA8-O (100 MHz, DMSO-*d*<sub>6</sub>).



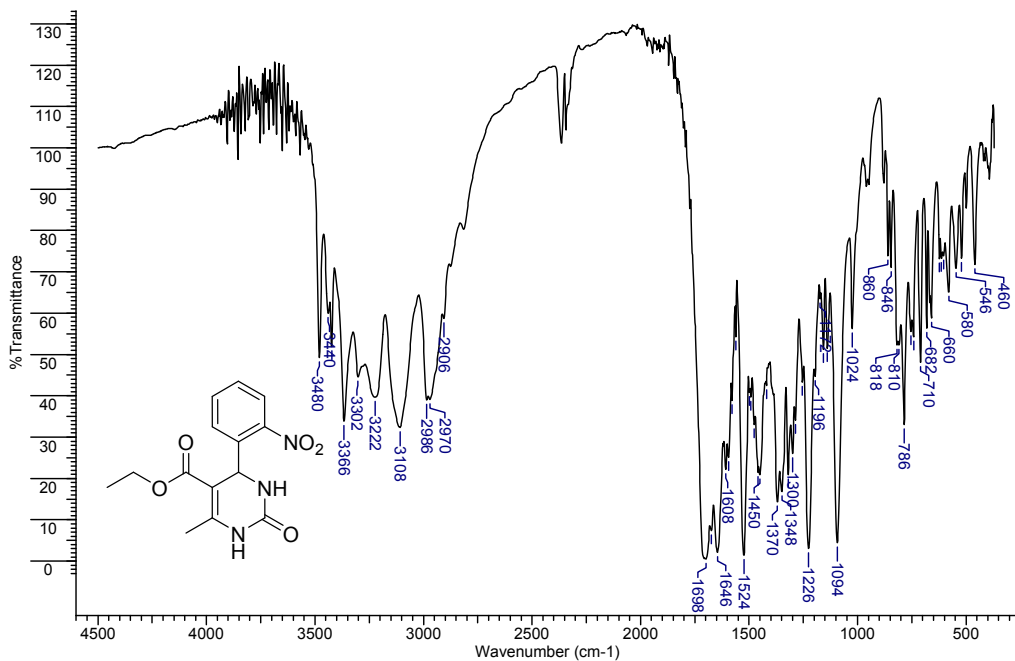

Figure S59. Infrared spectrum (KBr) of BA8-O.

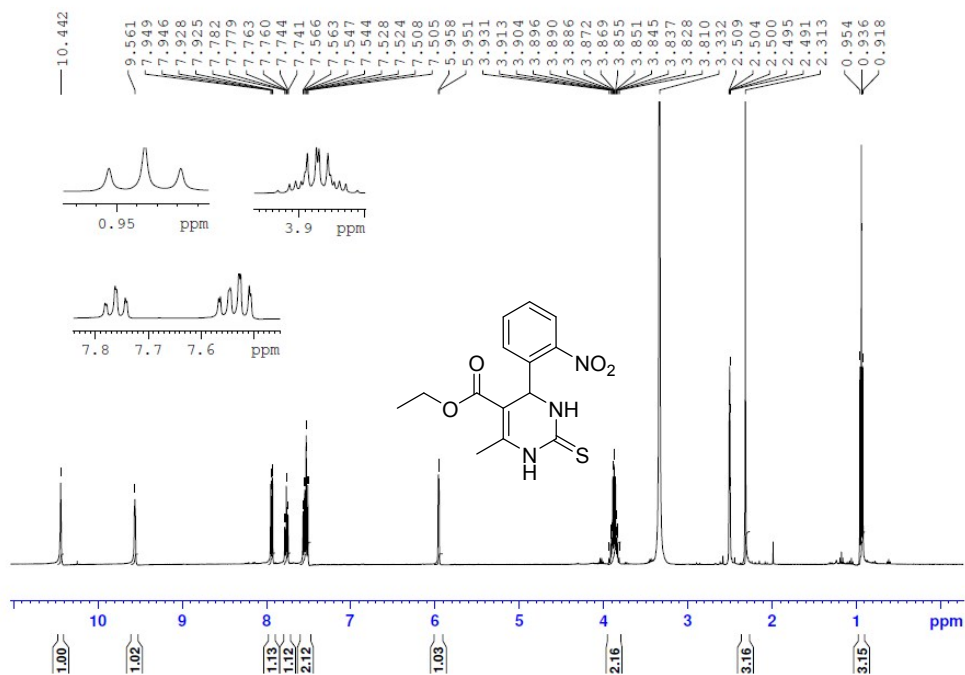

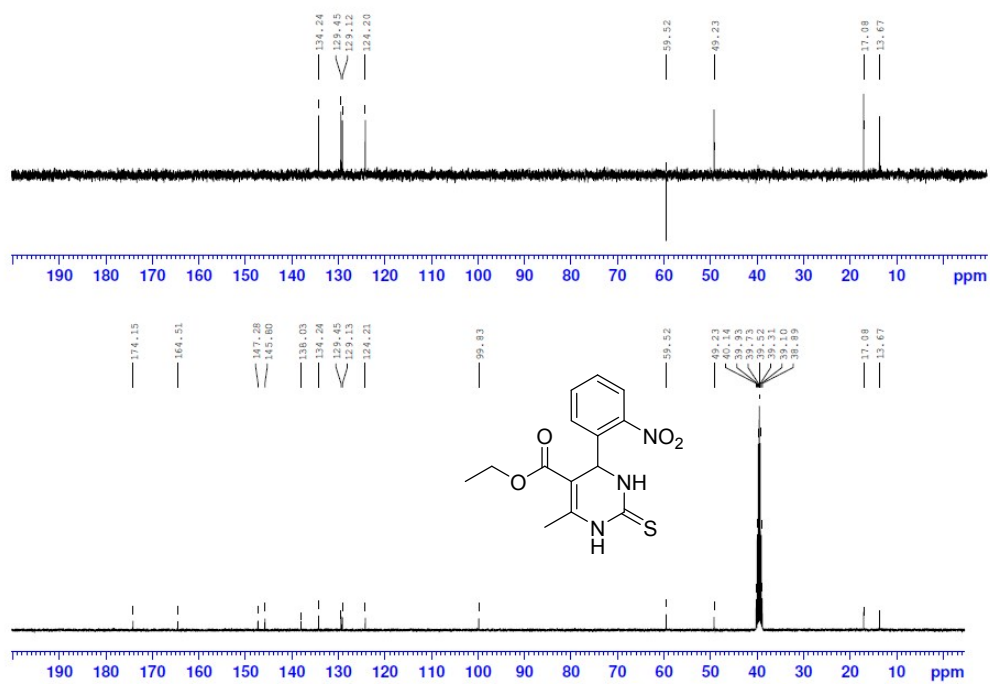

**Figure S61.**  $^{13}\text{C}$  spectrum (bottom) and DEPT 135 subspectrum of compound BA8-S (100 MHz, DMSO- $d_6$ ).

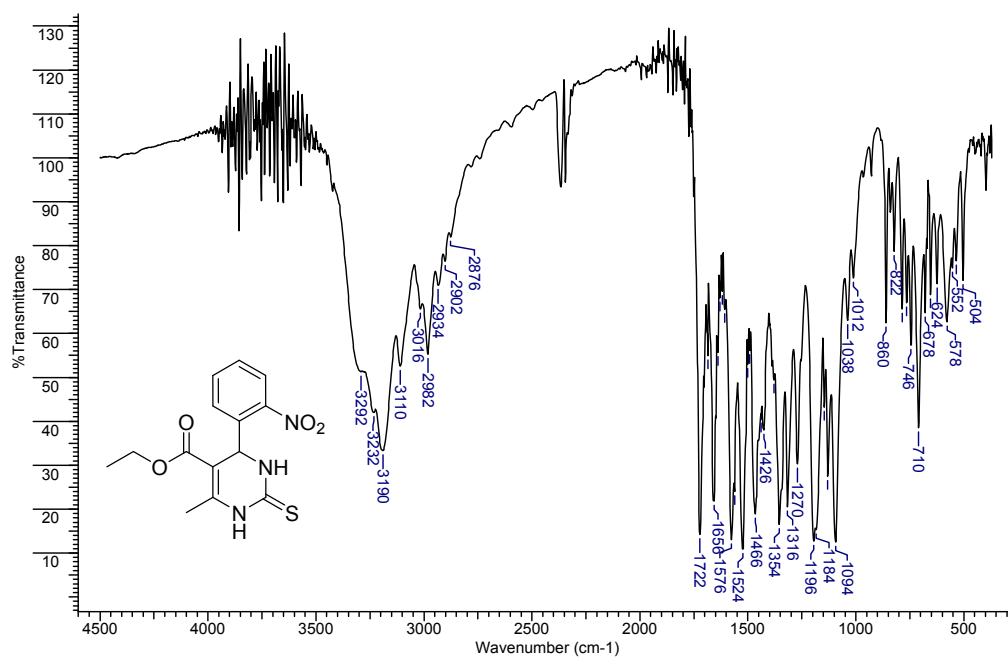

**Figure S62.** Infrared spectrum (KBr) of BA8-S.

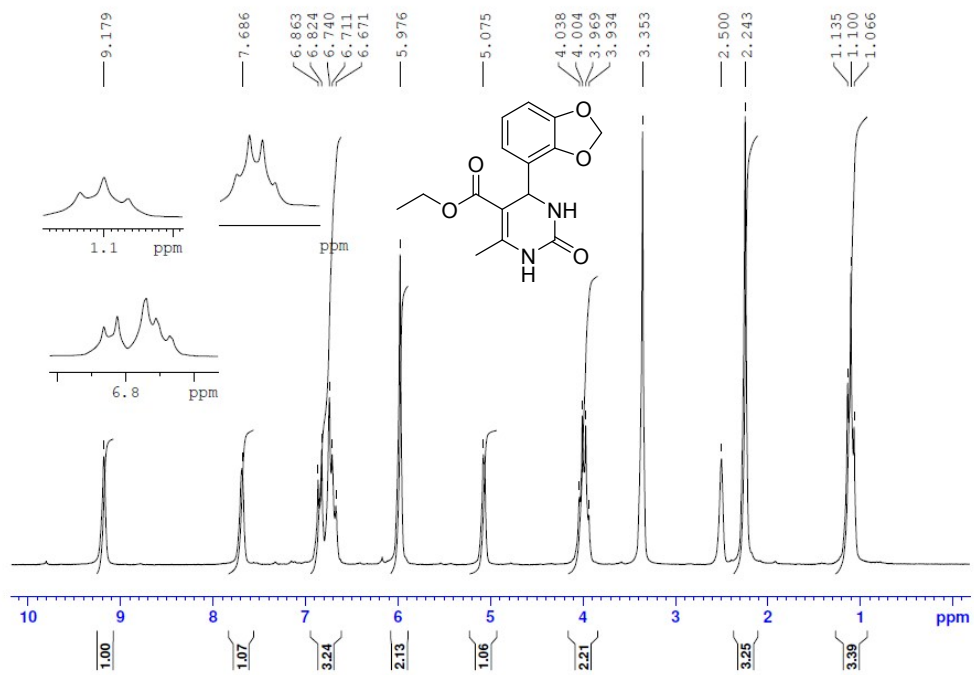

**Figure S63.**  $^1\text{H}$  spectrum of compound **BA9-O** (200 MHz,  $\text{DMSO-}d_6$ ).

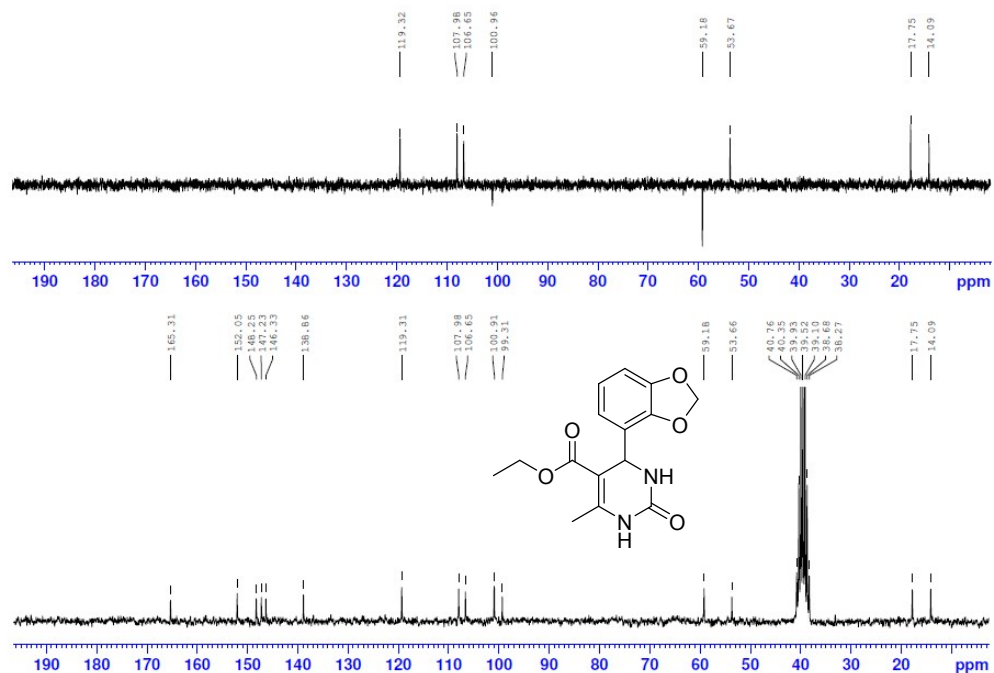

**Figure S64.**  $^{13}\text{C}$  spectrum (bottom) and DEPT 135 subspectrum of compound **BA9-O** (50 MHz,  $\text{DMSO-}d_6$ )



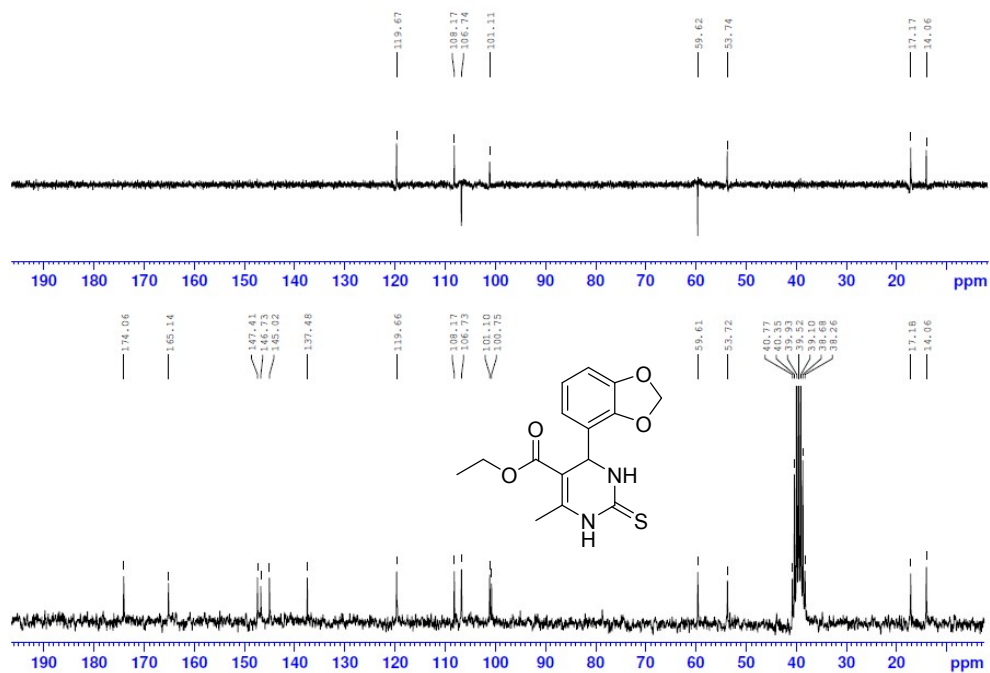

**Figure S67.**  $^{13}\text{C}$  spectrum (bottom) and DEPT 135 subspectrum of compound BA9-S (50 MHz,  $\text{DMSO}-d_6$ )

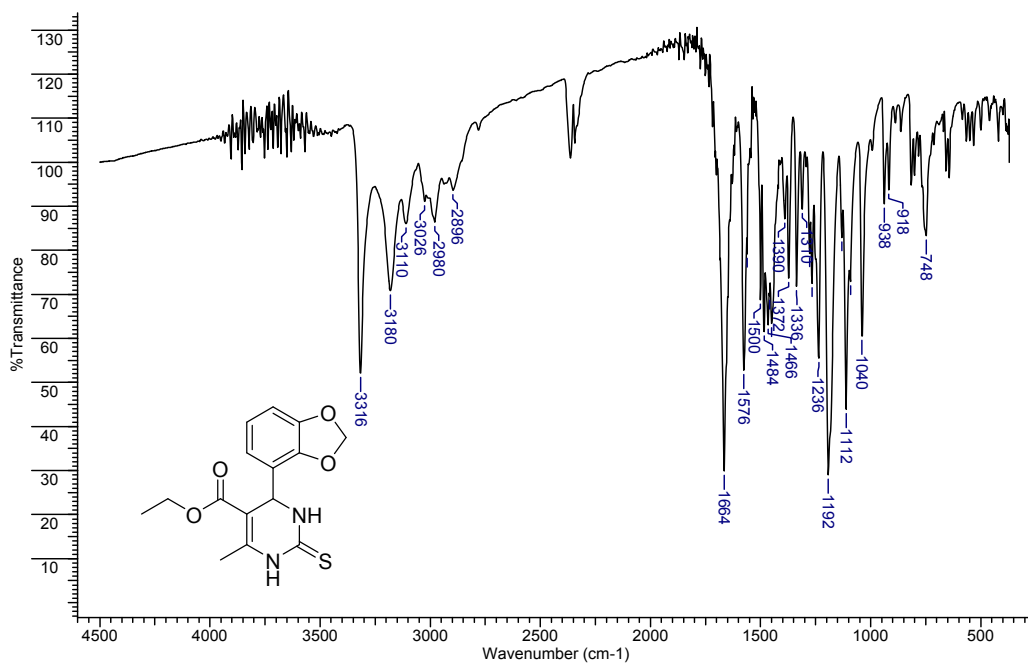

**Figure S68.** Infrared spectrum (KBr) of BA9-S.

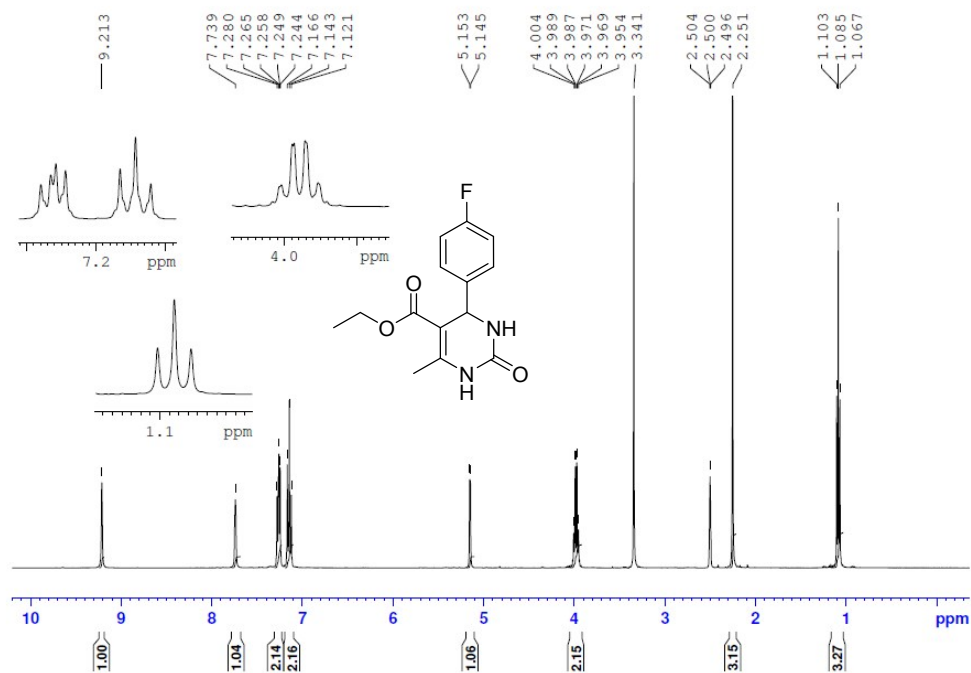

Figure S69. <sup>1</sup>H spectrum of compound BA10-O (200 MHz, DMSO-*d*<sub>6</sub>).

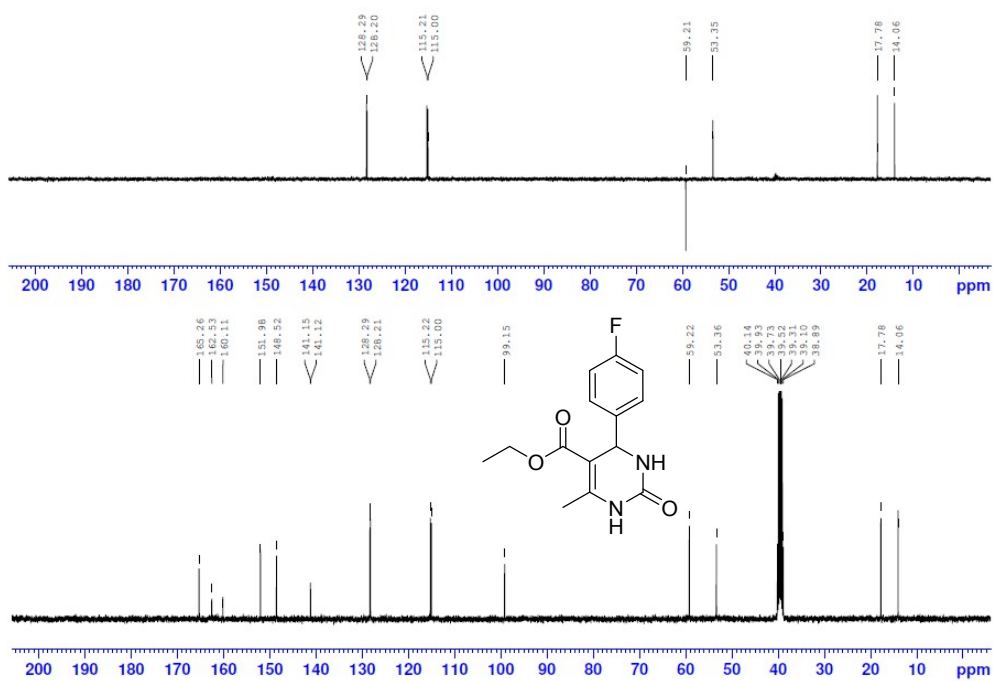



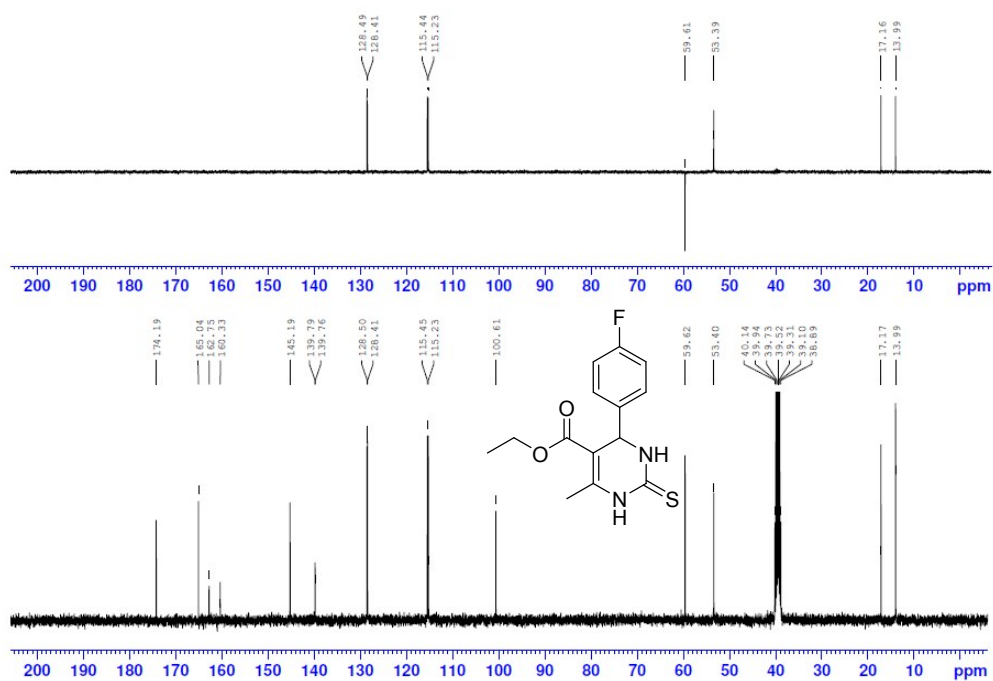

**Figure S73.**  $^{13}\text{C}$  spectrum (bottom) and DEPT 135 subspectrum of compound BA10-S (100 MHz, DMSO- $d_6$ ).

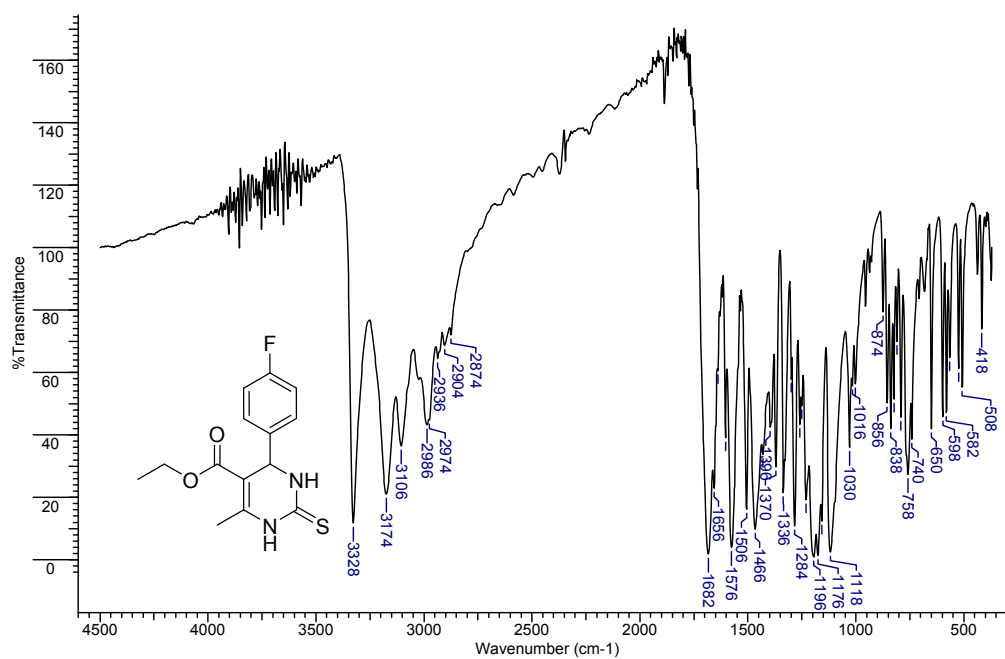

**Figure S74.** Infrared spectrum (KBr) of BA10-S.



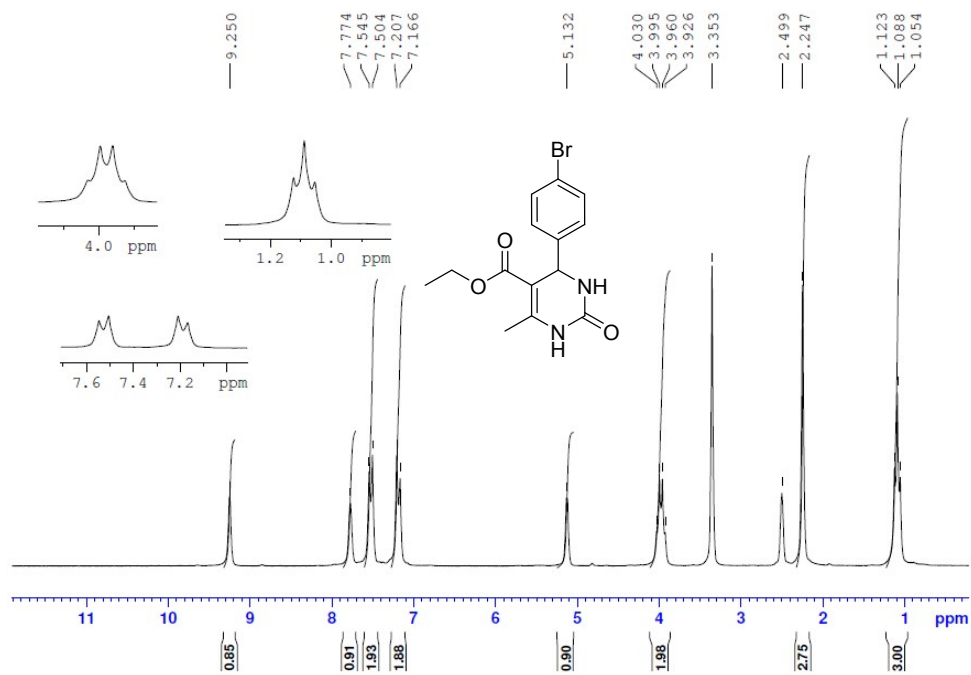

**Figure S75.**  $^1\text{H}$  spectrum of compound **BA11-O** (200 MHz,  $\text{DMSO-}d_6$ ).

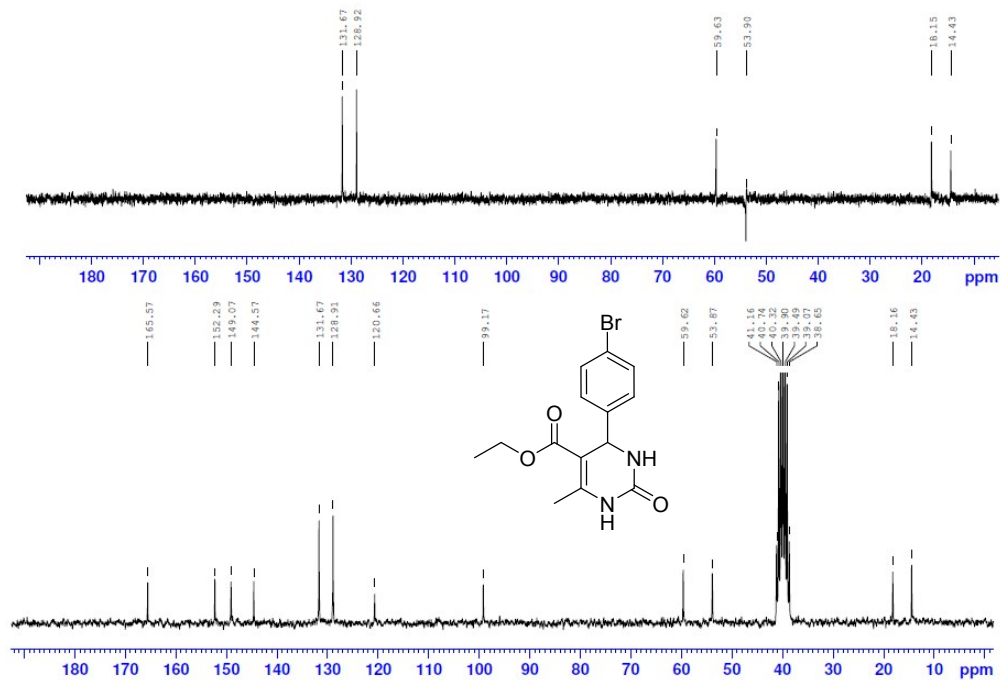

**Figure S76.**  $^{13}\text{C}$  spectrum (bottom) and DEPT 135 subspectrum of compound **BA11-O** (50 MHz,  $\text{DMSO-}d_6$ ).

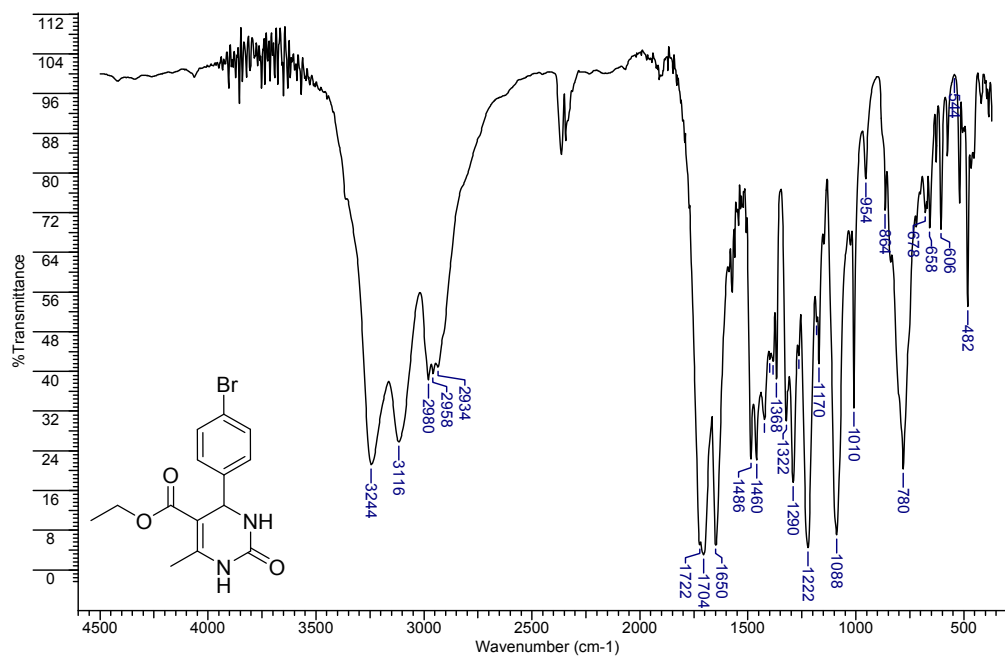

**Figure S77.** Infrared spectrum (KBr) of **BA11-O**.

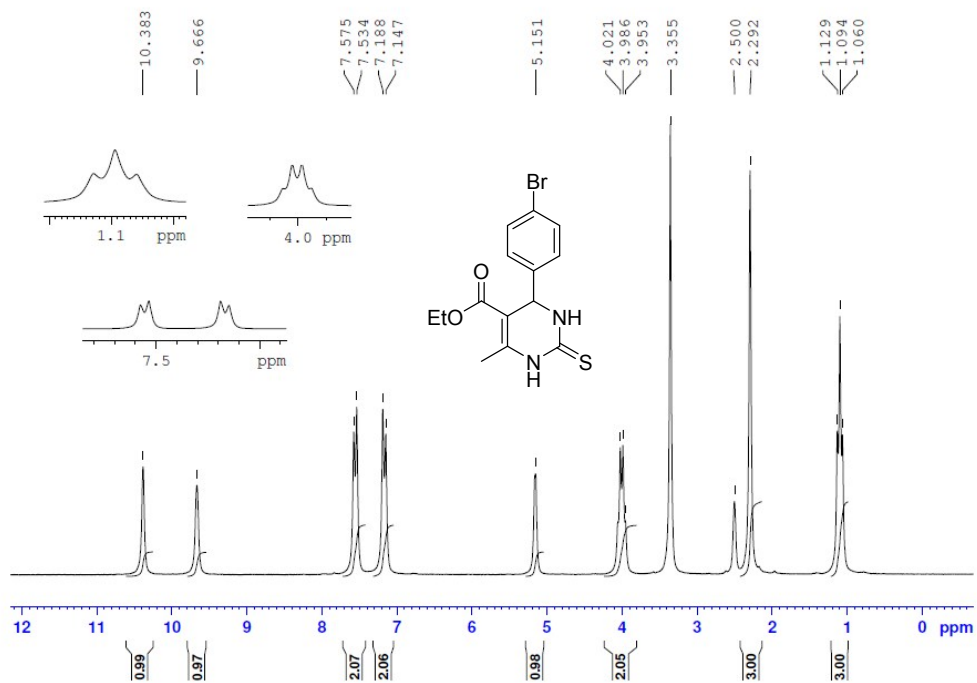

**Figure S78.**  $^1\text{H}$  spectrum of compound **BA11-S** (200 MHz,  $\text{DMSO-}d_6$ ).



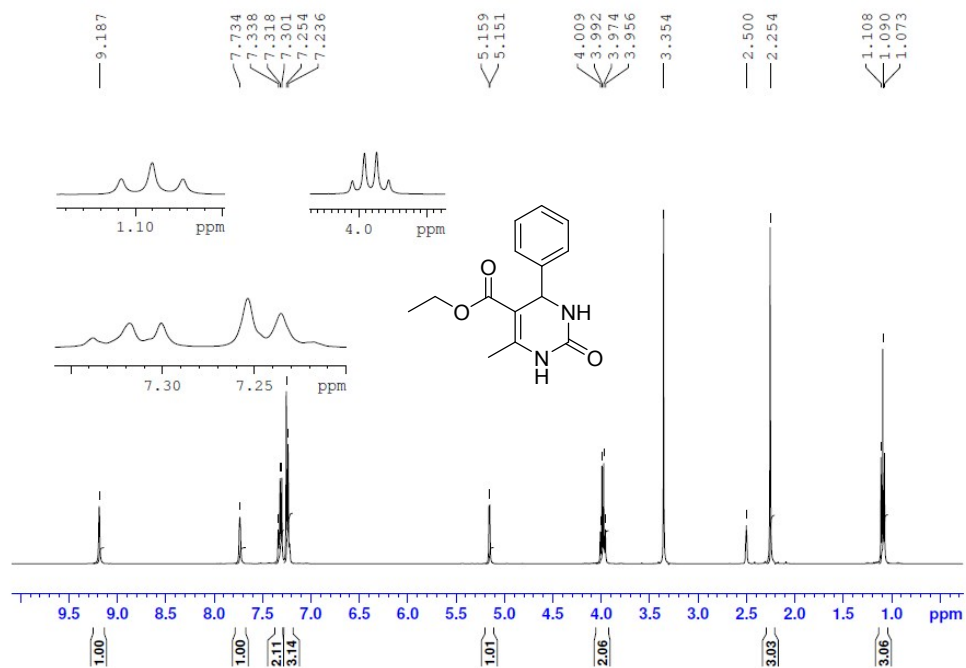

**Figure S81.** <sup>1</sup>H spectrum of compound BA12-O (400 MHz, DMSO-*d*<sub>6</sub>).

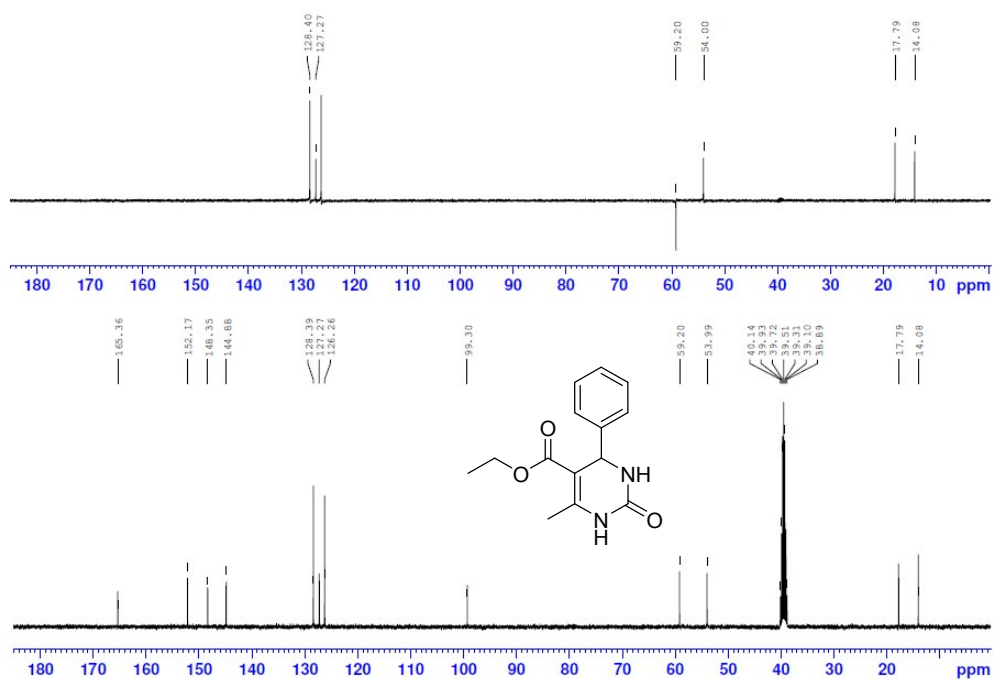

**Figure S82.** <sup>13</sup>C spectrum (bottom) and DEPT 135 subspectrum of compound BA12-O (100 MHz, DMSO-*d*<sub>6</sub>)

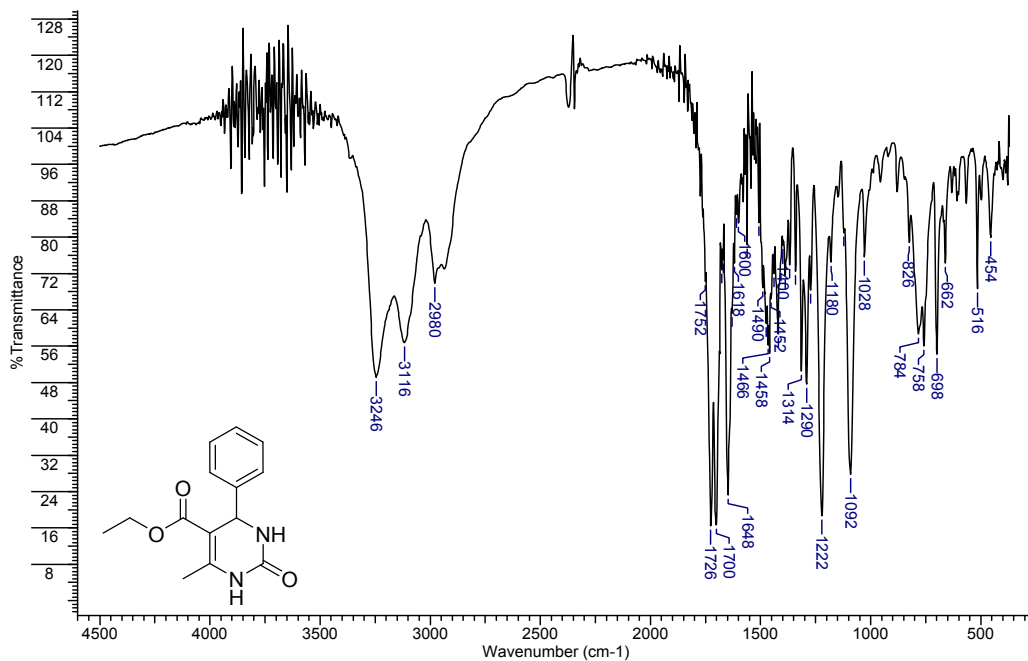

Figure S83. Infrared spectrum (KBr) of compound BA12-O.

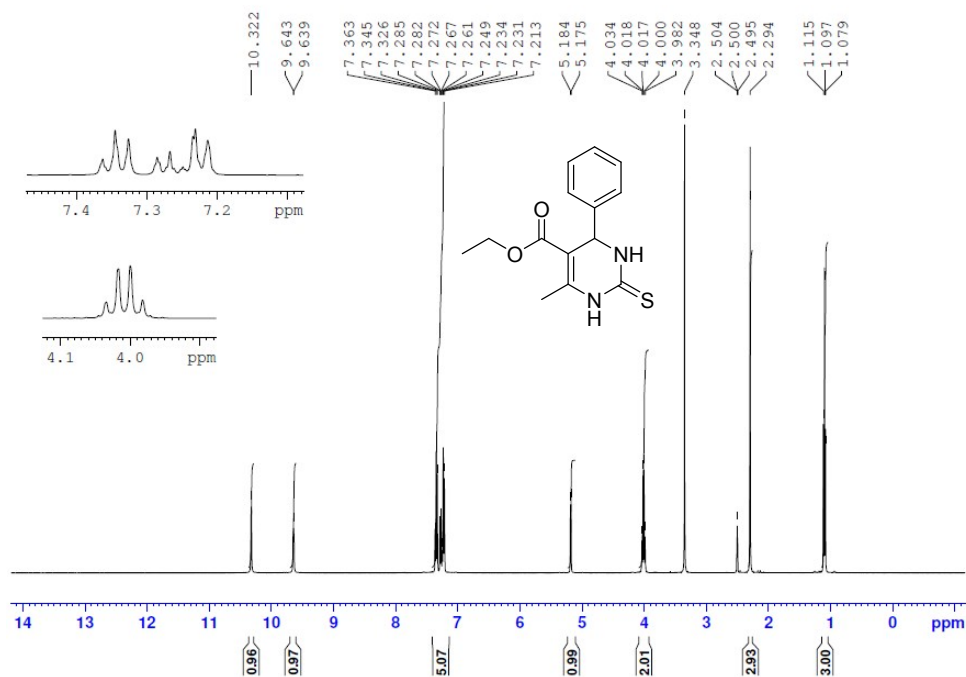

Figure S84. <sup>1</sup>H spectrum of compound BA12-S (400 MHz, DMSO-*d*<sub>6</sub>).

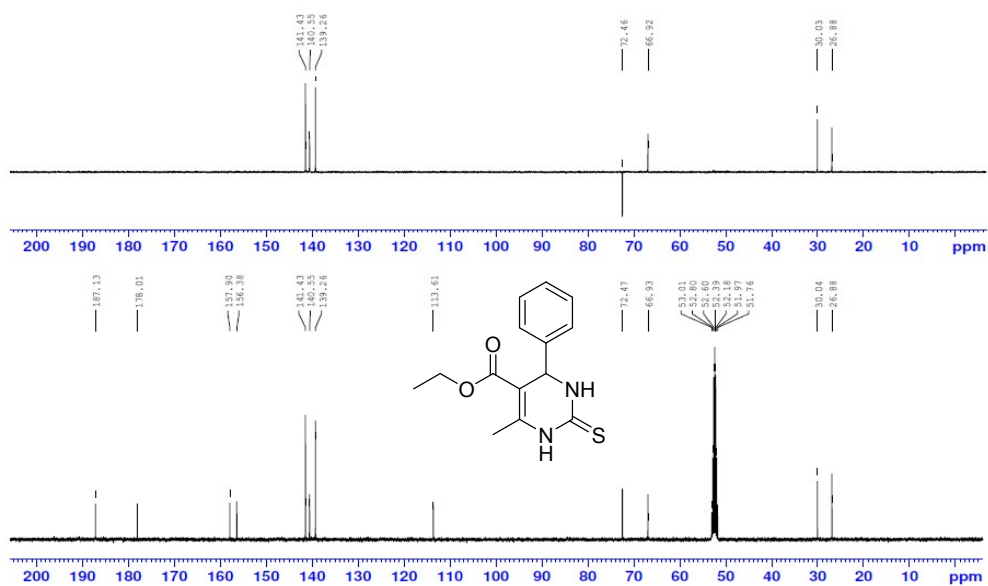

**Figure S85.**  $^{13}\text{C}$  spectrum (bottom) and DEPT 135 subspectrum of compound BA12-S (100 MHz, DMSO- $d_6$ ).

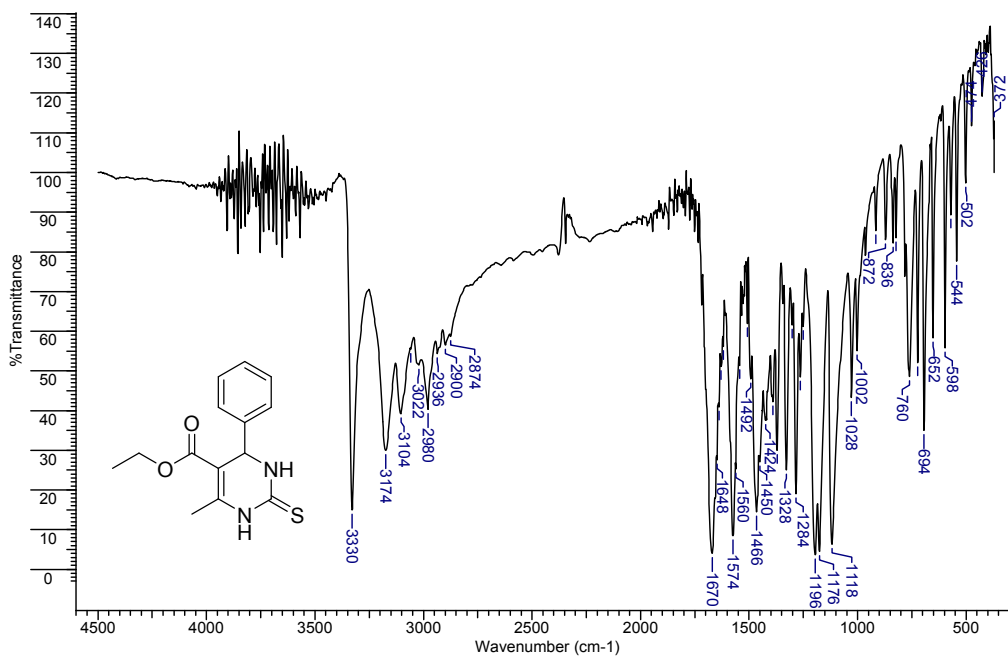

**Figure S86.** Infrared spectrum (KBr) of compound BA12-S.

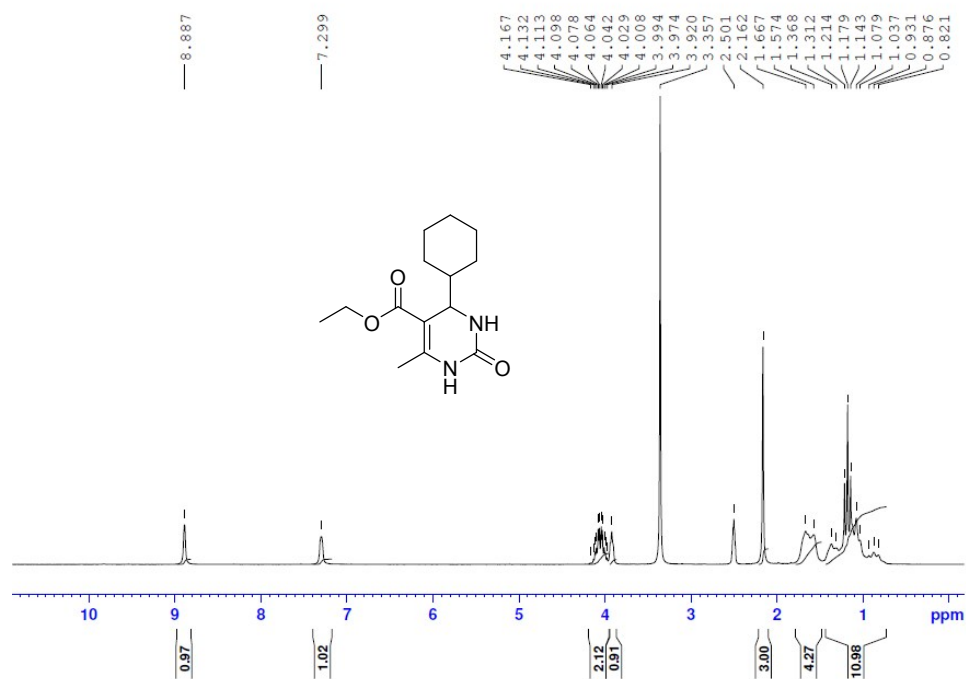

Figure S87. <sup>1</sup>H spectrum of compound **BA13-O** (200 MHz, DMSO-*d*<sub>6</sub>)

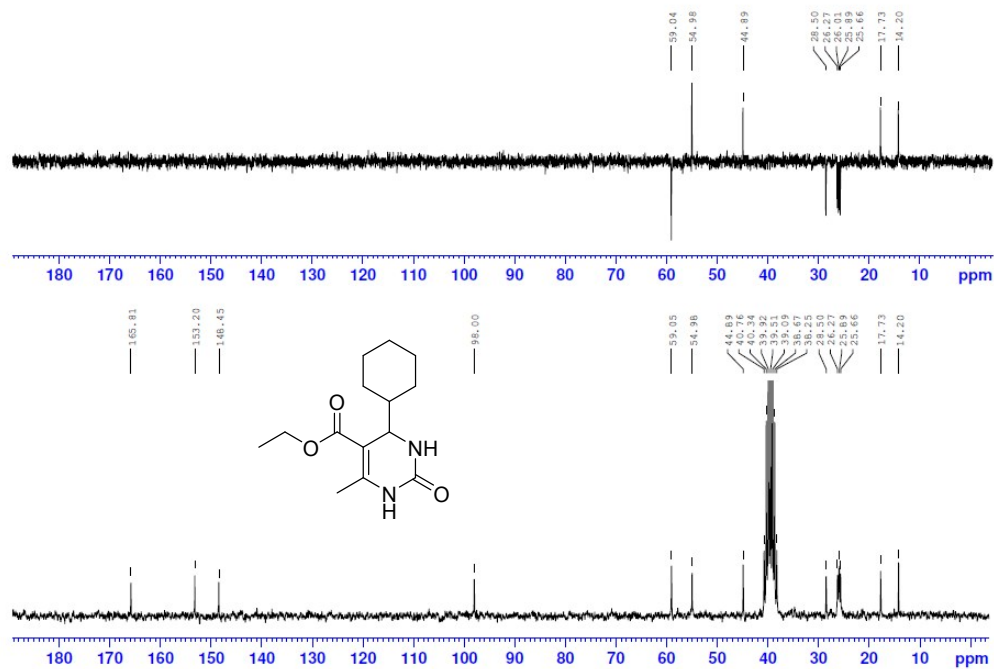

Figure S88. <sup>13</sup>C spectrum (bottom) and DEPT 135 subspectrum of compound **BA13-O** (50 MHz, DMSO-*d*<sub>6</sub>)

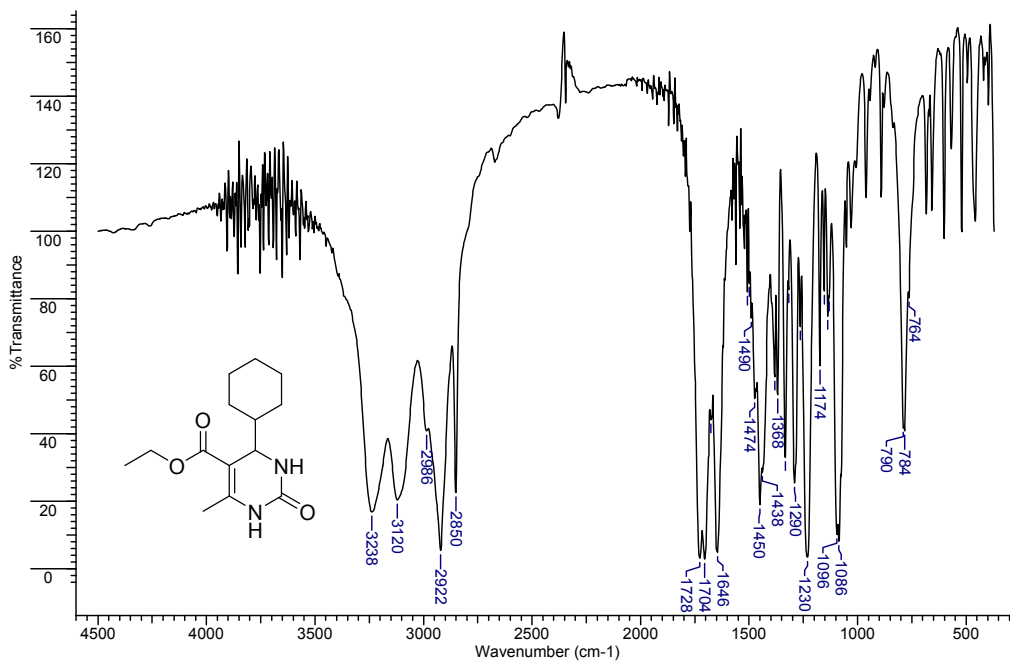

**Figure S89.** Infrared spectrum (KBr) of BA13-O.

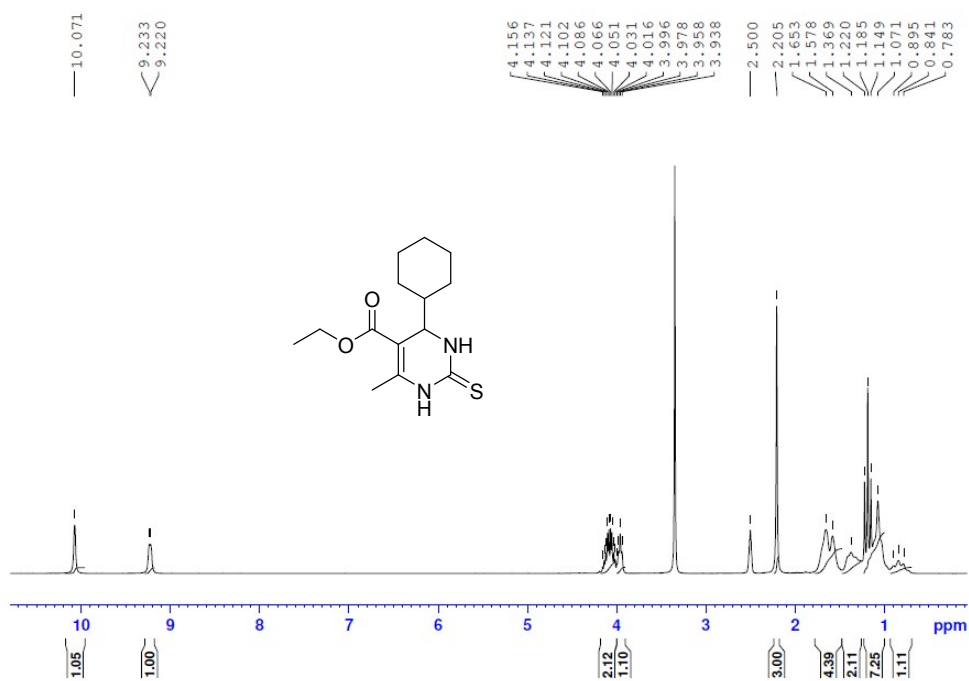

**Figure S90.**  $^1\text{H}$  spectrum of compound BA13-S (200 MHz,  $\text{DMSO-}d_6$ ).



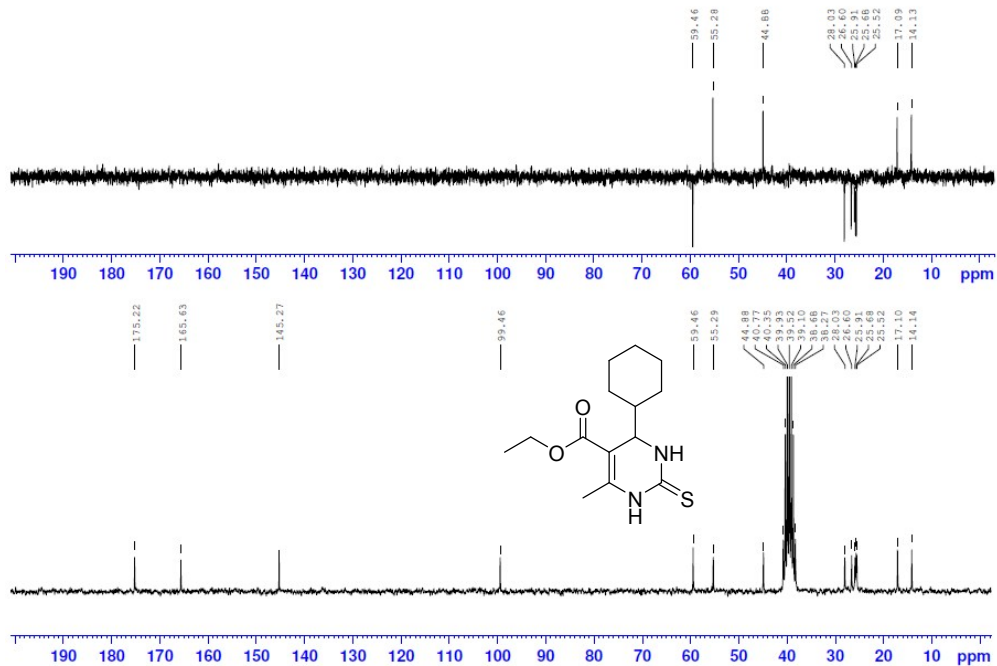

**Figure S91.**  $^{13}\text{C}$  spectrum (bottom) and DEPT 135 subspectrum of compound BA13-S (50 MHz, DMSO- $d_6$ )

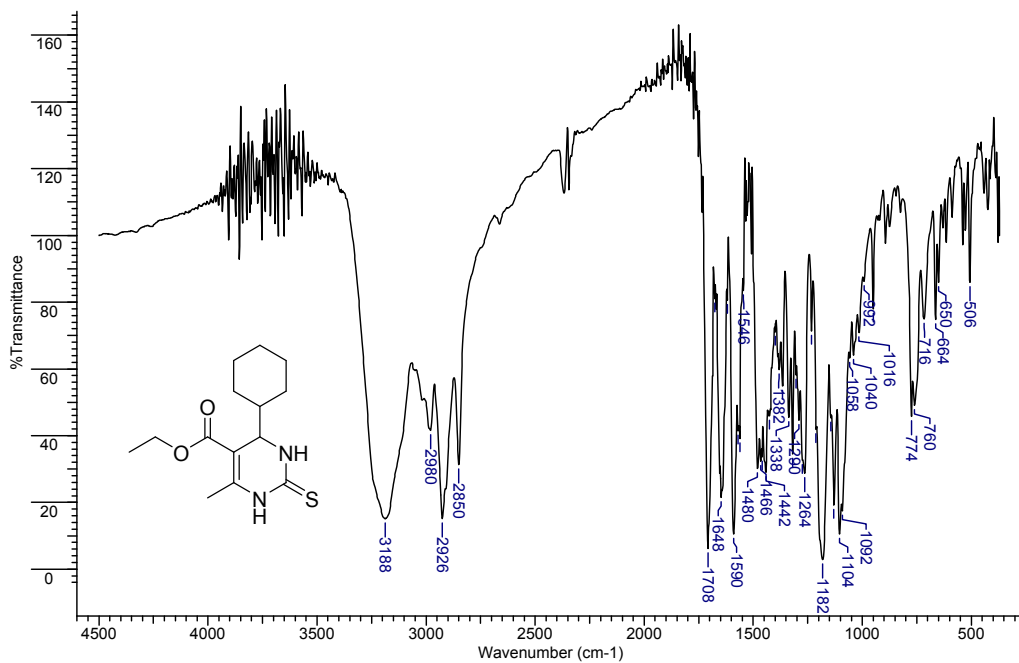

**Figure S92.** Infrared spectrum (KBr) of BA13-S.
